# Supplementary material for: The essential role of sugar metabolism in the acclimation response of Arabidopsis thaliana to high light intensities
Source: PubMed Central journal article supplement (PMC3967092; doi:10.1093/jxb/eru027), 2014-02-12
Supplement: supp_eru027_jexbot114363_file001.pdf [file supp_eru027_jexbot114363_file001.pdf]

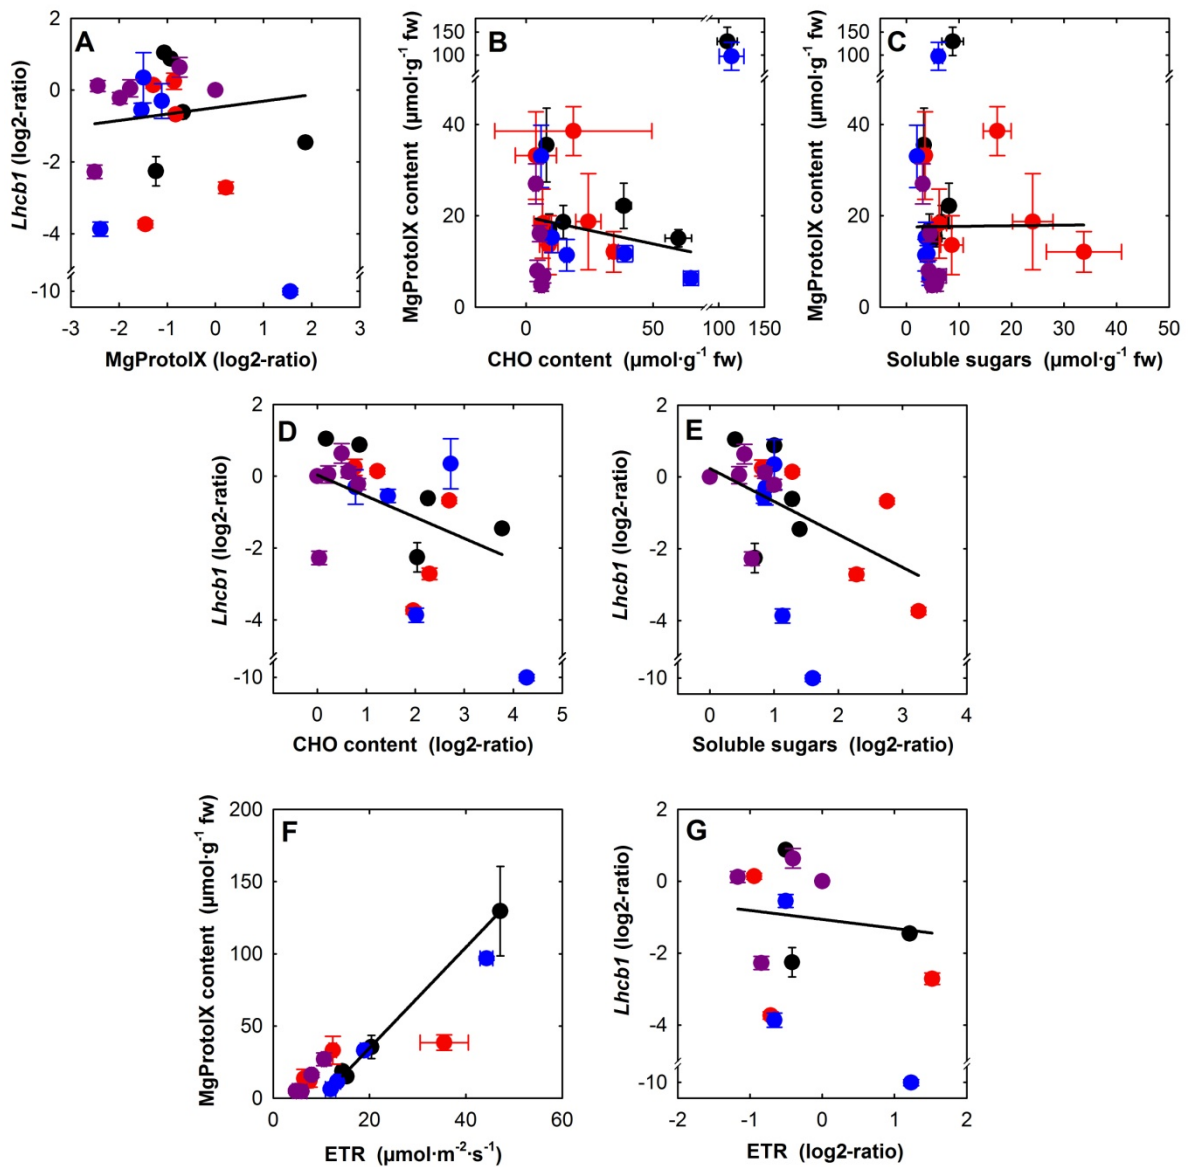

**Supplementary Fig. S1.** Correlation analyses of *Lhcb1* expression levels, ETR, as well as contents of MgProtoIX, soluble sugars and total carbohydrates. (A) *Lhcb1* expression vs MgProtoIX contents. MgProtoIX vs total carbohydrates (B), soluble sugars (C), or ETR (F). *Lhcb1* expression vs s total carbohydrates (D), soluble sugars (E), or ETR (G). The data were obtained from Figs. 1 to 3. Where necessary log<sub>2</sub>-ratios instead of absolute values were used. The colours represent Col-0 (black), *tpt-2* (blue), *adg1-1* (red) and *adg1-1/tpt-2* (dark purple).

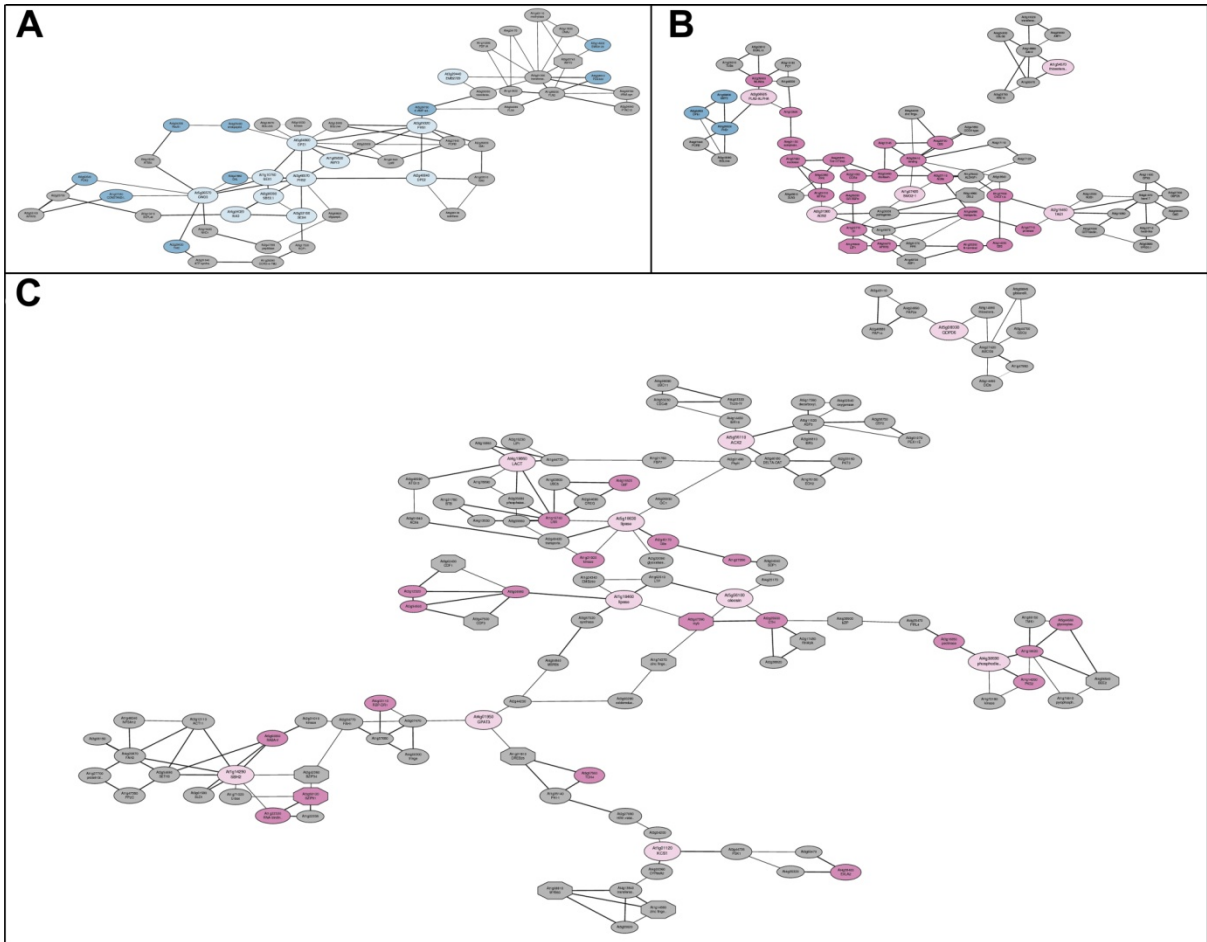

**Supplementary Fig. S2.** Graphviz presentation of co-expression networks obtained with ATTEDII for data shown in Supplementary Table S7A and Supplementary Document S3. The query genes were found amongst the commonly regulated genes 4h after LL/HL-transfer. `Query genes` related to major CHO metabolism (up-regulated) (**A**), lipid metabolism up- (**B**) or down-regulated (**C**), are marked in light blue or purple colour, respectively. Co-expressed genes identified as differentially regulated in the array experiment are marked in dark-blue or purple colour. All other genes within the co-expression network are marked in grey. The dark blue-coloured genes marked in (**B**) are associated with major CHO metabolism and were co-expressed with `query genes` for lipid metabolism.

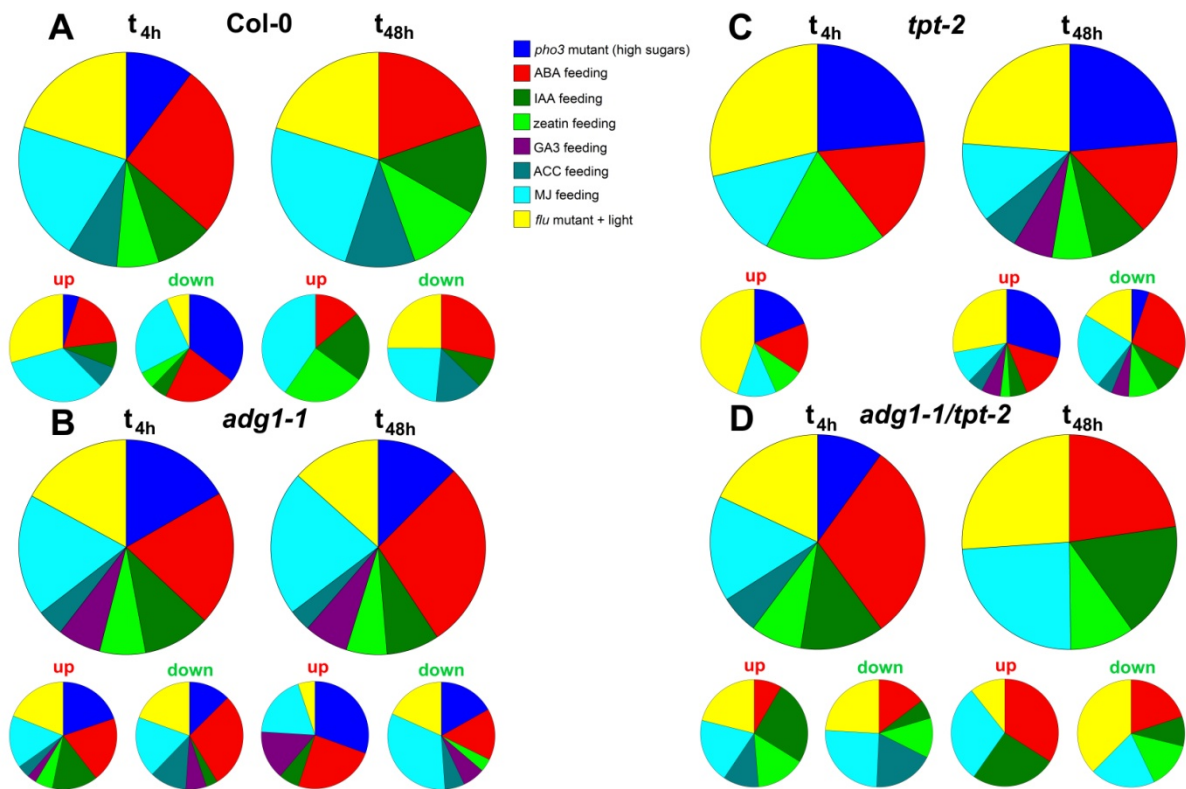

**Supplementary Figure S3.** Relative distribution of differentially regulated genes in publicly available microarray experiments compared to in-house expression data for Col-0 (A), *tpt-2* (B), *adg1-1* (C) and *adg1-1/tpt-2* at  $t_{4h}$  and  $t_{48h}$  after LL/HL-transfer.

**Supplementary Table S11.** Contents of metabolites determined by GC/MS in leaves of **(A)** Col-0, **(B)** *adg1-1*, **(C)** *tpt-2* and **(D)** *adg1-1/tpt-2* grown either continuously in LL or HL or after a LL/HL-transfer at  $t_{4h}$  or  $t_{48h}$ . The data represent the mean of five independent samples  $\pm$  SE.

**A**

| Metabolites                              | Relative metabolite content (arbitrary units·g <sup>-1</sup> fw) |                     |                     |                    |
|------------------------------------------|------------------------------------------------------------------|---------------------|---------------------|--------------------|
|                                          | Col-0 $t_0$ (LL)                                                 | Col-0 $t_{4h}$      | Col-0 $t_{48h}$     | Col-0 (HL)         |
| <b>Sugars</b>                            |                                                                  |                     |                     |                    |
| D-Sucrose                                | 3.255 $\pm$ 0.062                                                | 6.083 $\pm$ 0.101   | 7.325 $\pm$ 0.124   | 6.776 $\pm$ 0.190  |
| D-Glucose                                | 0.532 $\pm$ 0.039                                                | 21.348 $\pm$ 0.680  | 12.206 $\pm$ 1.136  | 13.711 $\pm$ 1.251 |
| D-Fructose                               | 0.737 $\pm$ 0.042                                                | 16.803 $\pm$ 0.449  | 9.683 $\pm$ 1.846   | 12.775 $\pm$ 0.897 |
| D-Mannose                                | 0.146 $\pm$ 0.012                                                | 0.496 $\pm$ 0.044   | 0.967 $\pm$ 0.572   | 1.215 $\pm$ 0.104  |
| D-Maltose                                | 0.122 $\pm$ 0.007                                                | 0.250 $\pm$ 0.020   | 1.871 $\pm$ 0.255   | 0.519 $\pm$ 0.027  |
| $\alpha,\alpha'$ - D-Trehalose           | 0.247 $\pm$ 0.026                                                | 0.476 $\pm$ 0.030   | 4.097 $\pm$ 0.431   | 2.844 $\pm$ 0.169  |
| Raffinose                                | 0.073 $\pm$ 0.015                                                | 0.369 $\pm$ 0.061   | 0.197 $\pm$ 0.027   | 2.117 $\pm$ 0.527  |
| 1,6-anhydro, $\beta$ -D-Glucose          | 6.101 $\pm$ 0.939                                                | 8.124 $\pm$ 1.125   | 14.672 $\pm$ 1.616  | 10.773 $\pm$ 1.493 |
| 1-O-methyl-, $\alpha$ -D-Mannopyranoside | 3.525 $\pm$ 0.158                                                | 3.642 $\pm$ 0.375   | 9.498 $\pm$ 0.492   | 6.665 $\pm$ 0.309  |
| DL-Fucose                                | 0.815 $\pm$ 0.025                                                | 2.280 $\pm$ 0.199   | 3.359 $\pm$ 0.314   | 3.463 $\pm$ 0.180  |
| D-Arabinose                              | 0.852 $\pm$ 0.054                                                | 0.609 $\pm$ 0.026   | 1.350 $\pm$ 0.066   | 1.502 $\pm$ 0.113  |
| Glucoheptose                             | 0.105 $\pm$ 0.012                                                | 0.331 $\pm$ 0.031   | 0.518 $\pm$ 0.062   | 0.400 $\pm$ 0.011  |
| <b>Amino acids</b>                       |                                                                  |                     |                     |                    |
| DL-Glutamic acid                         | 32.455 $\pm$ 1.864                                               | 124.727 $\pm$ 2.566 | 165.011 $\pm$ 2.397 | 39.409 $\pm$ 3.015 |
| L-Aspartic acid                          | 9.675 $\pm$ 0.164                                                | 9.138 $\pm$ 0.408   | 18.602 $\pm$ 1.704  | 6.243 $\pm$ 0.738  |
| DL-Asparagine                            | n.d.                                                             | 0.439 $\pm$ 0.167   | 3.457 $\pm$ 1.799   | 0.063 $\pm$ 0.007  |
| DL-Alanine                               | 1.700 $\pm$ 0.084                                                | 3.270 $\pm$ 0.615   | 5.075 $\pm$ 1.160   | 0.286 $\pm$ 0.039  |
| Glycine                                  | 3.515 $\pm$ 0.228                                                | 144.514 $\pm$ 2.407 | 115.600 $\pm$ 1.315 | 14.483 $\pm$ 0.327 |
| DL-Serine                                | 10.116 $\pm$ 0.358                                               | 28.045 $\pm$ 0.745  | 54.533 $\pm$ 1.411  | 38.380 $\pm$ 0.840 |
| DL-Threonine                             | 12.512 $\pm$ 0.546                                               | 19.471 $\pm$ 0.774  | 31.469 $\pm$ 0.879  | 10.606 $\pm$ 0.532 |
| DL-Cysteine                              | 0.611 $\pm$ 0.041                                                | 1.021 $\pm$ 0.138   | 2.313 $\pm$ 0.511   | 1.789 $\pm$ 0.212  |
| DL-Methionine                            | 0.168 $\pm$ 0.012                                                | 0.852 $\pm$ 0.077   | 0.823 $\pm$ 0.174   | 0.069 $\pm$ 0.014  |
| L-Isoleucine                             | 0.803 $\pm$ 0.014                                                | 3.146 $\pm$ 0.190   | 3.806 $\pm$ 0.259   | 3.342 $\pm$ 0.077  |
| DL-Valine                                | 3.195 $\pm$ 0.098                                                | 14.803 $\pm$ 0.463  | 16.162 $\pm$ 0.968  | 10.188 $\pm$ 0.458 |
| L-Lysine                                 | 0.195 $\pm$ 0.009                                                | 0.509 $\pm$ 0.037   | 0.649 $\pm$ 0.082   | 0.361 $\pm$ 0.031  |
| DL-Arginine, -NH <sub>3</sub>            | 0.082 $\pm$ 0.013                                                | 0.339 $\pm$ 0.022   | 0.826 $\pm$ 0.394   | 0.094 $\pm$ 0.008  |
| DL-Phenylalanine                         | 0.723 $\pm$ 0.042                                                | 9.609 $\pm$ 0.630   | 5.678 $\pm$ 1.749   | 2.007 $\pm$ 0.095  |
| DL-Tyrosine                              | n.d.                                                             | 0.430 $\pm$ 0.042   | 0.443 $\pm$ 0.123   | 0.151 $\pm$ 0.020  |
| L-Tryptophan                             | 0.440 $\pm$ 0.016                                                | 0.662 $\pm$ 0.052   | 0.778 $\pm$ 0.038   | 0.722 $\pm$ 0.027  |
| L-Proline                                | 7.164 $\pm$ 0.833                                                | 35.885 $\pm$ 1.733  | 60.061 $\pm$ 3.783  | 14.332 $\pm$ 2.103 |
| $\beta$ -Alanine                         | 0.159 $\pm$ 0.011                                                | 0.785 $\pm$ 0.065   | 1.383 $\pm$ 0.121   | 0.704 $\pm$ 0.051  |

**A (continued)**

| <b>Organic acids</b>                 | <b>Col-0 t<sub>0</sub> (LL)</b> | <b>Col-0 t<sub>4h</sub></b> | <b>Col-0 t<sub>48h</sub></b> | <b>Col-0 (HL)</b> |
|--------------------------------------|---------------------------------|-----------------------------|------------------------------|-------------------|
| Pyruvic acid                         | 0.610 ± 0.034                   | 0.667 ± 0.061               | 0.967 ± 0.067                | 0.841 ± 0.048     |
| 2-methyl-DL-Malic acid               | 0.094 ± 0.007                   | 0.338 ± 0.029               | 1.023 ± 0.028                | 0.516 ± 0.025     |
| Glutaric acid                        | 0.846 ± 0.058                   | 1.611 ± 0.235               | 5.958 ± 0.397                | 4.389 ± 0.098     |
| Succinic acid                        | 0.667 ± 0.029                   | 1.350 ± 0.114               | 6.427 ± 0.975                | 3.803 ± 0.257     |
| Fumaric acid                         | 106.355 ± 3.898                 | 125.302 ± 1.852             | 111.554 ± 2.943              | 133.314 ± 2.247   |
| Malonic acid                         | n.d.                            | 0.197 ± 0.022               | 0.193 ± 0.022                | 0.124 ± 0.018     |
| DL-Glyceric acid                     | 0.581 ± 0.016                   | 2.972 ± 0.359               | 3.602 ± 0.100                | 6.238 ± 0.211     |
| 3-hydroxy-Butyric acid               | 0.299 ± 0.017                   | 0.399 ± 0.051               | 0.733 ± 0.069                | 0.436 ± 0.025     |
| D-Gluconic acid or D-Galactonic acid | 7.233 ± 0.486                   | 11.108 ± 1.195              | 15.170 ± 1.927               | 20.526 ± 0.506    |
| Benzoic acid                         | 5.339 ± 0.149                   | 6.958 ± 0.712               | 7.477 ± 0.391                | 6.589 ± 0.154     |
| <b>Miscellaneous</b>                 | <b>Col-0 t<sub>0</sub> (LL)</b> | <b>Col-0 t<sub>4h</sub></b> | <b>Col-0 t<sub>48h</sub></b> | <b>Col-0 (HL)</b> |
| Glycerol                             | 1.502 ± 0.067                   | 2.968 ± 0.304               | 2.913 ± 0.140                | 3.985 ± 0.468     |
| myo-Inositol                         | 12.818 ± 0.580                  | 19.915 ± 0.402              | 23.725 ± 1.369               | 26.920 ± 0.374    |
| Galactinol                           | 0.091 ± 0.012                   | 0.571 ± 0.062               | 0.970 ± 0.174                | 4.876 ± 0.910     |
| Erythritol                           | 0.272 ± 0.012                   | 0.730 ± 0.088               | 1.060 ± 0.073                | 0.821 ± 0.049     |
| Tyramine                             | 0.408 ± 0.013                   | 0.797 ± 0.073               | 0.991 ± 0.154                | 1.452 ± 0.036     |
| DL-Ornithine                         | 0.601 ± 0.021                   | 2.979 ± 0.132               | 5.020 ± 1.605                | 0.569 ± 0.098     |
| Putrescine                           | 1.086 ± 0.073                   | 7.529 ± 0.641               | 10.936 ± 0.941               | 3.108 ± 0.486     |

**B**

| <b>Metabolites</b>               | <b>Relative metabolite content (arbitrary units·g<sup>-1</sup> fw)</b> |                                         |                                      |                                      |                           |
|----------------------------------|------------------------------------------------------------------------|-----------------------------------------|--------------------------------------|--------------------------------------|---------------------------|
|                                  | <b>Sugars</b>                                                          | <b><i>adg1-1</i> t<sub>0</sub> (LL)</b> | <b><i>adg1-1</i> t<sub>4h</sub></b>  | <b><i>adg1-1</i> t<sub>48h</sub></b> | <b><i>adg1-1</i> (HL)</b> |
| D-Sucrose                        |                                                                        | 5.662 ± 0.184                           | 6.691 ± 0.061                        | 7.080 ± 0.047                        | 7.897 ± 0.118             |
| D-Glucose                        |                                                                        | 6.765 ± 0.528                           | 25.970 ± 0.174                       | 24.411 ± 0.440                       | 26.822 ± 0.368            |
| D-Fructose                       |                                                                        | 10.905 ± 0.632                          | 20.173 ± 0.213                       | 19.711 ± 0.366                       | 20.947 ± 0.336            |
| D-Mannose                        |                                                                        | 0.486 ± 0.017                           | 1.116 ± 0.115                        | 3.837 ± 0.181                        | 1.859 ± 0.126             |
| D-Maltose                        |                                                                        | n.d.                                    | 0.545 ± 0.030                        | 0.517 ± 0.044                        | 0.142 ± 0.012             |
| α,α'- D-Trehalose                |                                                                        | 0.162 ± 0.013                           | 0.437 ± 0.034                        | 3.334 ± 0.229                        | 1.476 ± 0.066             |
| Raffinose                        |                                                                        | n.d.                                    | 0.168 ± 0.019                        | 0.074 ± 0.007                        | 0.111 ± 0.015             |
| 1,6-anhydro, β-D-Glucose         |                                                                        | 7.350 ± 0.730                           | 16.062 ± 0.622                       | 18.570 ± 1.735                       | 22.615 ± 3.391            |
| 1-O-methyl-, α-D-Mannopyranoside |                                                                        | 3.547 ± 0.333                           | 1.722 ± 0.139                        | 1.457 ± 0.031                        | 2.071 ± 0.223             |
| DL-Fucose                        |                                                                        | 1.303 ± 0.034                           | 2.939 ± 0.289                        | 4.932 ± 0.199                        | 4.252 ± 0.280             |
| D-Arabinose                      |                                                                        | 1.070 ± 0.032                           | 0.654 ± 0.043                        | 2.080 ± 0.205                        | 2.795 ± 2.265             |
| Glucoheptose                     |                                                                        | 0.167 ± 0.010                           | 0.444 ± 0.018                        | 0.781 ± 0.033                        | 0.529 ± 0.035             |
| <b>Amino acids</b>               | <b><i>adg1-1</i> t<sub>0</sub> (LL)</b>                                | <b><i>adg1-1</i> t<sub>4h</sub></b>     | <b><i>adg1-1</i> t<sub>48h</sub></b> | <b><i>adg1-1</i> (HL)</b>            |                           |
| DL-Glutamic acid                 | 29.829 ± 1.808                                                         | 65.857 ± 5.493                          | 176.494 ± 1.888                      | 37.772 ± 1.714                       |                           |
| L-Aspartic acid                  | 7.341 ± 0.280                                                          | 8.407 ± 0.426                           | 13.491 ± 0.952                       | 5.025 ± 0.400                        |                           |
| DL-Asparagine                    | 0.193 ± 0.056                                                          | 0.062 ± 0.013                           | 12.021 ± 1.145                       | 0.273 ± 0.065                        |                           |
| DL-Alanine                       | 1.778 ± 0.095                                                          | 2.735 ± 0.452                           | 10.569 ± 1.408                       | 1.272 ± 0.161                        |                           |
| Glycine                          | 4.776 ± 0.235                                                          | 84.629 ± 3.231                          | 116.061 ± 1.686                      | 22.941 ± 1.590                       |                           |
| DL-Serine                        | 6.097 ± 0.222                                                          | 23.157 ± 1.375                          | 49.678 ± 1.476                       | 25.879 ± 1.761                       |                           |
| DL-Threonine                     | 16.884 ± 0.636                                                         | 21.588 ± 1.051                          | 33.180 ± 1.800                       | 20.370 ± 1.934                       |                           |
| DL-Cysteine                      | 0.941 ± 0.035                                                          | 1.374 ± 0.136                           | 4.577 ± 0.420                        | 3.200 ± 0.250                        |                           |
| DL-Methionine                    | 0.137 ± 0.016                                                          | 0.485 ± 0.058                           | 0.532 ± 0.066                        | 0.106 ± 0.011                        |                           |
| L-Isoleucine                     | 0.925 ± 0.025                                                          | 2.984 ± 0.338                           | 3.552 ± 0.203                        | 2.962 ± 0.256                        |                           |
| DL-Valine                        | 3.308 ± 0.092                                                          | 12.348 ± 0.903                          | 19.391 ± 1.093                       | 12.170 ± 0.954                       |                           |
| L-Lysine                         | 0.284 ± 0.011                                                          | 0.635 ± 0.038                           | 0.961 ± 0.082                        | 0.534 ± 0.049                        |                           |
| DL-Arginine, -NH <sub>3</sub>    | 0.074 ± 0.007                                                          | 0.335 ± 0.037                           | 2.837 ± 0.324                        | 0.221 ± 0.023                        |                           |
| DL-Phenylalanine                 | 1.869 ± 0.039                                                          | 12.419 ± 1.041                          | 14.334 ± 0.922                       | 3.100 ± 0.172                        |                           |
| DL-Tyrosine                      | 0.060 ± 0.003                                                          | 0.428 ± 0.031                           | 1.004 ± 0.085                        | 0.250 ± 0.040                        |                           |
| L-Tryptophan                     | 0.334 ± 0.016                                                          | 0.564 ± 0.018                           | 0.638 ± 0.018                        | 0.581 ± 0.029                        |                           |
| L-Proline                        | 4.014 ± 0.293                                                          | 30.162 ± 2.257                          | 67.997 ± 7.015                       | 18.805 ± 2.639                       |                           |
| β-Alanine                        | 0.353 ± 0.022                                                          | 0.585 ± 0.078                           | 2.124 ± 0.108                        | 0.855 ± 0.057                        |                           |

**B (continued)**

| <b>Organic acids</b>                 | <b><i>adg1-1</i> t<sub>0</sub> (LL)</b> | <b><i>adg1-1</i> t<sub>4h</sub></b> | <b><i>adg1-1</i> t<sub>48h</sub></b> | <b><i>adg1-1</i> (HL)</b> |
|--------------------------------------|-----------------------------------------|-------------------------------------|--------------------------------------|---------------------------|
| Pyruvic acid                         | 0.527 ± 0.043                           | 0.525 ± 0.043                       | 0.870 ± 0.050                        | 1.086 ± 0.061             |
| 2-Methyl-DL-malic acid               | 0.121 ± 0.009                           | 0.357 ± 0.033                       | 1.132 ± 0.064                        | 0.616 ± 0.023             |
| Glutaric acid                        | 1.075 ± 0.026                           | 1.827 ± 0.183                       | 5.075 ± 0.333                        | 3.033 ± 0.141             |
| Succinic acid                        | 1.045 ± 0.040                           | 3.746 ± 0.427                       | 13.658 ± 0.547                       | 4.391 ± 0.164             |
| Fumaric acid                         | 136.964 ± 4.410                         | 115.525 ± 1.695                     | 98.817 ± 3.491                       | 116.770 ± 2.312           |
| Malonic acid                         | n.d.                                    | 0.105 ± 0.018                       | 0.176 ± 0.034                        | 0.069 ± 0.012             |
| DL-Glyceric acid                     | 0.395 ± 0.008                           | 2.993 ± 0.358                       | 4.656 ± 0.256                        | 3.977 ± 0.216             |
| 3-hydroxy-Butyric acid               | 0.210 ± 0.015                           | 0.335 ± 0.039                       | 0.589 ± 0.067                        | 0.331 ± 0.051             |
| D-Gluconic acid or D-Galactonic acid | 10.026 ± 0.467                          | 12.481 ± 1.317                      | 14.139 ± 2.164                       | 14.509 ± 1.642            |
| Benzoic acid                         | 4.206 ± 0.339                           | 6.773 ± 0.685                       | 6.524 ± 0.305                        | 7.034 ± 0.272             |
| <b>Miscellaneous</b>                 | <b><i>adg1-1</i> t<sub>0</sub> (LL)</b> | <b><i>adg1-1</i> t<sub>4h</sub></b> | <b><i>adg1-1</i> t<sub>48h</sub></b> | <b><i>adg1-1</i> (HL)</b> |
| Glycerol                             | 1.243 ± 0.024                           | 2.197 ± 0.245                       | 2.552 ± 0.047                        | 4.424 ± 1.145             |
| myo-Inositol                         | 6.351 ± 0.345                           | 13.788 ± 0.778                      | 18.833 ± 0.741                       | 16.165 ± 0.538            |
| Galactinol                           | n.d.                                    | 0.310 ± 0.034                       | 0.170 ± 0.015                        | 0.473 ± 0.077             |
| Tyramine                             | 0.444 ± 0.020                           | 0.938 ± 0.084                       | 0.643 ± 0.111                        | 0.877 ± 0.086             |
| Erythritol                           | 0.527 ± 0.039                           | 1.070 ± 0.125                       | 4.685 ± 0.379                        | 1.436 ± 0.093             |
| DL-Ornithine                         | 1.059 ± 0.047                           | 2.072 ± 0.244                       | 11.812 ± 1.380                       | 1.245 ± 0.135             |
| Putrescine                           | 2.931 ± 0.101                           | 9.603 ± 1.257                       | 36.145 ± 2.688                       | 11.367 ± 1.118            |

## C

| Metabolites                      | Relative metabolite content (arbitrary units·g <sup>-1</sup> fw) |                              |                               |                   |
|----------------------------------|------------------------------------------------------------------|------------------------------|-------------------------------|-------------------|
|                                  | <i>tpt-2</i> t <sub>0</sub> (LL)                                 | <i>tpt-2</i> t <sub>4h</sub> | <i>tpt-2</i> t <sub>48h</sub> | <i>tpt-2</i> (HL) |
| <b>Sugars</b>                    |                                                                  |                              |                               |                   |
| D-Sucrose                        | 3.386 ± 0.063                                                    | 4.175 ± 0.157                | 7.152 ± 0.127                 | 8.134 ± 0.248     |
| D-Glucose                        | 0.666 ± 0.044                                                    | 3.189 ± 0.224                | 22.965 ± 0.685                | 16.006 ± 0.748    |
| D-Fructose                       | 0.913 ± 0.032                                                    | 3.376 ± 0.236                | 17.424 ± 0.464                | 8.609 ± 0.564     |
| D-Mannose                        | 0.191 ± 0.017                                                    | 0.462 ± 0.041                | 0.769 ± 0.030                 | 0.562 ± 0.059     |
| D-Maltose                        | 0.886 ± 0.045                                                    | 0.509 ± 0.055                | 10.976 ± 0.813                | 6.708 ± 0.954     |
| α,α'- D-Trehalose                | 0.248 ± 0.016                                                    | 0.314 ± 0.029                | 1.223 ± 0.126                 | 0.838 ± 0.080     |
| Raffinose                        | 0.104 ± 0.010                                                    | 0.350 ± 0.057                | 0.250 ± 0.022                 | 0.139 ± 0.023     |
| 1,6-anhydro, β-D-Glucose         | 3.593 ± 0.493                                                    | 9.476 ± 1.402                | 10.553 ± 0.445                | 14.375 ± 2.019    |
| 1-O-methyl-, α-D-Mannopyranoside | 6.533 ± 0.223                                                    | 7.662 ± 0.506                | 2.200 ± 0.164                 | 5.778 ± 0.810     |
| DL-Fucose                        | 0.920 ± 0.054                                                    | 1.963 ± 0.130                | 3.657 ± 0.173                 | 2.427 ± 0.341     |
| D-Arabinose                      | 0.815 ± 0.096                                                    | 0.723 ± 0.060                | 1.221 ± 0.092                 | 2.577 ± 0.249     |
| Glucoheptose                     | 0.096 ± 0.022                                                    | 0.325 ± 0.043                | 0.374 ± 0.056                 | 0.222 ± 0.021     |
| <b>Amino acids</b>               |                                                                  |                              |                               |                   |
| DL-Glutamic acid                 | 53.294 ± 2.592                                                   | 98.735 ± 6.497               | 169.430 ± 3.908               | 87.257 ± 9.739    |
| L-Aspartic acid                  | 12.935 ± 0.680                                                   | 18.301 ± 1.220               | 19.163 ± 1.581                | 13.648 ± 1.869    |
| DL-Asparagine                    | n.d.                                                             | 0.045 ± 0.009                | 2.847 ± 0.382                 | 0.820 ± 0.381     |
| DL-Alanine                       | 2.357 ± 0.057                                                    | 3.526 ± 0.258                | 10.505 ± 0.598                | 3.275 ± 0.229     |
| Glycine                          | 4.407 ± 0.258                                                    | 107.478 ± 1.701              | 109.623 ± 2.306               | 80.016 ± 3.368    |
| DL-Serine                        | 15.969 ± 0.706                                                   | 65.008 ± 0.910               | 66.137 ± 1.239                | 63.031 ± 1.454    |
| DL-Threonine                     | 15.830 ± 0.973                                                   | 42.280 ± 1.347               | 39.311 ± 1.212                | 44.857 ± 1.726    |
| DL-Cysteine                      | 0.558 ± 0.064                                                    | 1.255 ± 0.155                | 2.019 ± 0.116                 | 2.007 ± 0.316     |
| DL-Methionine                    | 0.238 ± 0.023                                                    | 1.074 ± 0.155                | 0.782 ± 0.117                 | 0.328 ± 0.061     |
| L-Isoleucine                     | 1.038 ± 0.041                                                    | 3.647 ± 0.383                | 4.447 ± 0.150                 | 3.851 ± 0.326     |
| DL-Valine                        | 4.621 ± 0.156                                                    | 15.562 ± 1.432               | 24.076 ± 1.064                | 17.124 ± 1.605    |
| L-Lysine                         | 0.242 ± 0.017                                                    | 0.488 ± 0.071                | 0.617 ± 0.033                 | 0.637 ± 0.063     |
| DL-Arginine, -NH <sub>3</sub>    | 0.128 ± 0.019                                                    | 0.256 ± 0.039                | 0.677 ± 0.032                 | 0.286 ± 0.055     |
| DL-Phenylalanine                 | 0.911 ± 0.037                                                    | 3.588 ± 0.331                | 5.816 ± 0.289                 | 3.486 ± 0.489     |
| DL-Tyrosine                      | n.d.                                                             | 0.102 ± 0.024                | 0.493 ± 0.021                 | 0.229 ± 0.028     |
| L-Tryptophan                     | 0.492 ± 0.030                                                    | 0.644 ± 0.044                | 0.731 ± 0.029                 | 0.554 ± 0.033     |
| L-Proline                        | 6.839 ± 0.425                                                    | 70.172 ± 4.469               | 42.499 ± 4.535                | 70.521 ± 5.587    |
| β-Alanine                        | 0.187 ± 0.008                                                    | 0.862 ± 0.083                | 1.800 ± 0.092                 | 1.360 ± 0.134     |



**C (continued)**

| <b>Organic acids</b>                 | <b><i>tpt-2</i> t<sub>0</sub> (LL)</b> | <b><i>tpt-2</i> t<sub>4h</sub></b> | <b><i>tpt-2</i> t<sub>48h</sub></b> | <b><i>tpt-2</i> (HL)</b> |
|--------------------------------------|----------------------------------------|------------------------------------|-------------------------------------|--------------------------|
| Pyruvic acid                         | 0.794 ± 0.059                          | 1.637 ± 0.176                      | 1.069 ± 0.037                       | 1.612 ± 0.190            |
| 2-Methyl-DL-malic acid               | 0.166 ± 0.007                          | 0.416 ± 0.017                      | 1.213 ± 0.043                       | 0.557 ± 0.050            |
| Glutaric acid                        | 0.947 ± 0.045                          | 1.632 ± 0.126                      | 5.024 ± 0.269                       | 2.771 ± 0.353            |
| Succinic acid                        | 1.447 ± 0.058                          | 3.816 ± 0.270                      | 10.514 ± 0.443                      | 8.221 ± 0.919            |
| Fumaric acid                         | 117.778 ± 3.673                        | 101.630 ± 2.485                    | 91.506 ± 2.352                      | 112.648 ± 3.501          |
| Malonic acid                         | n.d.                                   | 0.207 ± 0.020                      | 0.204 ± 0.015                       | 0.247 ± 0.153            |
| DL-Glyceric acid                     | 0.804 ± 0.038                          | 7.920 ± 0.485                      | 8.878 ± 0.388                       | 7.281 ± 0.698            |
| 3-hydroxy-Butyric acid               | 0.408 ± 0.018                          | 0.560 ± 0.037                      | 0.794 ± 0.042                       | 0.524 ± 0.069            |
| D-Gluconic acid or D-Galactonic acid | 7.160 ± 0.460                          | 11.984 ± 1.322                     | 14.063 ± 1.256                      | 25.587 ± 3.280           |
| Benzoic acid                         | 5.736 ± 0.143                          | 7.487 ± 0.184                      | 7.347 ± 0.295                       | 8.712 ± 0.887            |
| <b>Miscellaneous</b>                 | <b><i>tpt-2</i> t<sub>0</sub> (LL)</b> | <b><i>tpt-2</i> t<sub>4</sub></b>  | <b><i>tpt-2</i> t<sub>48</sub></b>  | <b><i>tpt-2</i> (HL)</b> |
| Glycerol                             | 1.415 ± 0.048                          | 2.790 ± 0.236                      | 2.413 ± 0.127                       | 3.547 ± 0.182            |
| myo-Inositol                         | 11.443 ± 0.722                         | 18.019 ± 0.436                     | 23.179 ± 0.533                      | 15.782 ± 0.559           |
| Galactinol                           | 0.127 ± 0.013                          | 1.549 ± 0.204                      | 1.312 ± 0.123                       | 0.413 ± 0.047            |
| Tyramine                             | 0.422 ± 0.032                          | 0.679 ± 0.048                      | 0.854 ± 0.086                       | 1.120 ± 0.134            |
| Erythritol                           | 0.352 ± 0.031                          | 0.779 ± 0.062                      | 1.283 ± 0.067                       | 1.287 ± 0.161            |
| DL-Ornithine                         | 0.708 ± 0.047                          | 1.835 ± 0.304                      | 4.192 ± 0.348                       | 1.745 ± 0.218            |
| Putrescine                           | 1.140 ± 0.054                          | 3.902 ± 0.345                      | 16.551 ± 0.999                      | 14.764 ± 1.628           |

## D

| Metabolites                      | Relative metabolite content (arbitrary units·g <sup>-1</sup> fw) |                                     |                                      |                          |
|----------------------------------|------------------------------------------------------------------|-------------------------------------|--------------------------------------|--------------------------|
|                                  | <i>adg1-1/tpt-2</i> t <sub>0</sub> (LL)                          | <i>adg1-1/tpt-2</i> t <sub>4h</sub> | <i>adg1-1/tpt-2</i> t <sub>48h</sub> | <i>adg1-1/tpt-2</i> (HL) |
| <b>Sugars</b>                    |                                                                  |                                     |                                      |                          |
| D-Sucrose                        | 3.790 ± 0.149                                                    | 5.294 ± 0.073                       | 5.928 ± 0.082                        | 4.770 ± 0.186            |
| D-Glucose                        | 2.923 ± 0.439                                                    | 13.410 ± 1.300                      | 10.768 ± 0.736                       | 5.729 ± 0.771            |
| D-Fructose                       | 3.924 ± 0.476                                                    | 5.836 ± 0.473                       | 8.440 ± 0.537                        | 3.758 ± 0.287            |
| D-Mannose                        | 0.300 ± 0.017                                                    | 0.737 ± 0.085                       | 0.582 ± 0.012                        | 0.353 ± 0.022            |
| D-Maltose                        | n.d.                                                             | 0.379 ± 0.043                       | 0.205 ± 0.017                        | 0.141 ± 0.034            |
| α,α'- D-Trehalose                | 0.152 ± 0.019                                                    | 0.178 ± 0.019                       | 0.250 ± 0.026                        | 0.759 ± 0.098            |
| Raffinose                        | n.d.                                                             | 0.137 ± 0.016                       | 0.032 ± 0.003                        | n.d.                     |
| 1,6-anhydro, β-D-Glucose         | 5.285 ± 1.062                                                    | 14.692 ± 1.139                      | 16.991 ± 1.032                       | 6.848 ± 1.479            |
| 1-O-methyl-, α-D-Mannopyranoside | 4.754 ± 0.185                                                    | 4.072 ± 0.258                       | 5.782 ± 0.318                        | 3.755 ± 0.359            |
| DL-Fucose                        | 1.145 ± 0.042                                                    | 2.504 ± 0.330                       | 1.623 ± 0.038                        | 1.152 ± 0.102            |
| D-Arabinose                      | 1.283 ± 0.081                                                    | 0.891 ± 0.104                       | 1.871 ± 0.101                        | 1.404 ± 0.109            |
| Glucoheptose                     | 0.152 ± 0.014                                                    | 0.314 ± 0.042                       | 0.378 ± 0.019                        | 0.137 ± 0.010            |
| <b>Amino acids</b>               | <i>adg1-1/tpt-2</i> t <sub>0</sub> (LL)                          | <i>adg1-1/tpt-2</i> t <sub>4h</sub> | <i>adg1-1/tpt-2</i> t <sub>48h</sub> | <i>adg1-1/tpt-2</i> (HL) |
| DL-Glutamic acid                 | 35.303 ± 1.804                                                   | 73.146 ± 5.631                      | 70.013 ± 4.776                       | 37.772 ± 4.500           |
| L-Aspartic acid                  | 10.986 ± 0.890                                                   | 13.559 ± 0.590                      | 15.069 ± 1.222                       | 11.318 ± 1.376           |
| DL-Asparagine                    | n.d.                                                             | 0.030 ± 0.003                       | 0.125 ± 0.032                        | 0.505 ± 0.174            |
| DL-Alanine                       | 2.148 ± 0.188                                                    | 5.947 ± 0.495                       | 6.390 ± 0.614                        | 0.950 ± 0.080            |
| Glycine                          | 2.523 ± 0.148                                                    | 20.289 ± 1.631                      | 7.615 ± 0.377                        | 4.302 ± 0.255            |
| DL-Serine                        | 7.704 ± 0.517                                                    | 19.015 ± 1.191                      | 16.563 ± 0.494                       | 14.933 ± 0.676           |
| DL-Threonine                     | 49.848 ± 0.911                                                   | 68.305 ± 4.333                      | 51.722 ± 2.373                       | 72.887 ± 4.955           |
| DL-Cysteine                      | 0.791 ± 0.105                                                    | 1.359 ± 0.183                       | 2.691 ± 0.209                        | 1.060 ± 0.156            |
| DL-Methionine                    | 0.125 ± 0.029                                                    | 0.387 ± 0.070                       | 0.269 ± 0.037                        | 0.118 ± 0.018            |
| L-Isoleucine                     | 1.233 ± 0.052                                                    | 3.347 ± 0.234                       | 3.065 ± 0.178                        | 2.165 ± 0.114            |
| DL-Valine                        | 4.867 ± 0.303                                                    | 13.861 ± 0.900                      | 12.719 ± 0.614                       | 6.813 ± 0.446            |
| L-Lysine                         | 0.369 ± 0.019                                                    | 0.604 ± 0.086                       | 0.657 ± 0.029                        | 0.523 ± 0.052            |
| DL-Arginine, -NH <sub>3</sub>    | 0.092 ± 0.011                                                    | 0.219 ± 0.026                       | 0.194 ± 0.011                        | 0.097 ± 0.010            |
| DL-Phenylalanine                 | 1.341 ± 0.115                                                    | 3.051 ± 0.259                       | 2.354 ± 0.112                        | 1.095 ± 0.104            |
| DL-Tyrosine                      | n.d.                                                             | 0.092 ± 0.027                       | 0.167 ± 0.018                        | 0.121 ± 0.021            |
| L-Tryptophan                     | 0.482 ± 0.015                                                    | 0.561 ± 0.041                       | 0.632 ± 0.009                        | 0.514 ± 0.037            |
| L-Proline                        | 6.943 ± 1.310                                                    | 26.598 ± 1.854                      | 22.410 ± 4.796                       | 9.856 ± 1.323            |
| β-Alanine                        | 0.435 ± 0.016                                                    | 0.614 ± 0.048                       | 1.475 ± 0.046                        | 1.003 ± 0.073            |

**D (continued)**

| <b>Organic acids</b>                 | <b><i>adg1-1/tpt-2</i> t<sub>0</sub> (LL)</b> | <b><i>adg1-1/tpt-2</i> t<sub>4h</sub></b> | <b><i>adg1-1/tpt-2</i> t<sub>48h</sub></b> | <b><i>adg1-1/tpt-2</i> (HL)</b> |
|--------------------------------------|-----------------------------------------------|-------------------------------------------|--------------------------------------------|---------------------------------|
| Pyruvic acid                         | 0.623 ± 0.032                                 | 1.098 ± 0.066                             | 1.085 ± 0.119                              | 0.624 ± 0.024                   |
| 2-Methyl-DL-malic acid               | 0.163 ± 0.017                                 | 0.380 ± 0.013                             | 0.615 ± 0.021                              | 0.164 ± 0.019                   |
| Glutaric acid                        | 1.089 ± 0.039                                 | 1.516 ± 0.179                             | 2.077 ± 0.054                              | 1.113 ± 0.051                   |
| Succinic acid                        | 1.055 ± 0.070                                 | 3.552 ± 0.184                             | 2.543 ± 0.075                              | 0.707 ± 0.050                   |
| Fumaric acid                         | 96.776 ± 1.606                                | 91.044 ± 1.664                            | 85.786 ± 1.356                             | 82.427 ± 10.166                 |
| Malonic acid                         | n.d.                                          | 0.141 ± 0.022                             | 0.141 ± 0.008                              | 0.077 ± 0.008                   |
| DL-Glyceric acid                     | 0.401 ± 0.012                                 | 0.957 ± 0.103                             | 0.897 ± 0.038                              | 0.784 ± 0.056                   |
| 3-hydroxy-Butyric acid               | 0.381 ± 0.024                                 | 0.502 ± 0.056                             | 0.513 ± 0.020                              | 0.308 ± 0.044                   |
| D-Gluconic acid or D-Galactonic acid | 9.217 ± 0.680                                 | 15.217 ± 1.815                            | 17.174 ± 0.751                             | 11.413 ± 1.477                  |
| Benzoic acid                         | 5.675 ± 0.215                                 | 5.329 ± 0.288                             | 5.027 ± 0.070                              | 5.944 ± 0.278                   |
| <b>Miscellaneous</b>                 | <b><i>adg1-1/tpt-2</i> t<sub>0</sub> (LL)</b> | <b><i>adg1-1/tpt-2</i> t<sub>4h</sub></b> | <b><i>adg1-1/tpt-2</i> t<sub>48h</sub></b> | <b><i>adg1-1/tpt-2</i> (HL)</b> |
| Glycerol                             | 1.222 ± 0.125                                 | 2.269 ± 0.164                             | 2.330 ± 0.194                              | 10.105 ± 3.539                  |
| myo-Inositol                         | 7.066 ± 0.155                                 | 13.693 ± 0.513                            | 16.346 ± 0.444                             | 6.161 ± 0.348                   |
| Galactinol                           | 0.127 ± 0.028                                 | 0.459 ± 0.059                             | 0.166 ± 0.010                              | 0.073 ± 0.013                   |
| Erythritol                           | 0.886 ± 0.019                                 | 1.572 ± 0.086                             | 1.794 ± 0.036                              | 1.962 ± 0.211                   |
| Tyramine                             | 0.527 ± 0.013                                 | 0.810 ± 0.116                             | 0.688 ± 0.016                              | 0.588 ± 0.034                   |
| DL-Ornithine                         | 0.712 ± 0.057                                 | 0.945 ± 0.108                             | 1.308 ± 0.085                              | 1.252 ± 0.116                   |
| Putrescine                           | 1.919 ± 0.123                                 | 6.920 ± 0.981                             | 5.177 ± 0.385                              | 5.953 ± 0.883                   |

## Supplementary Document S1

**Document S1 (Table 1).** Statistical analysis (ANOVA/Tukey-Kramer) of photosynthetic electron transport (ETR) and  $F_v/F_m$  ratios of wild-type and mutant plants in a time series after transfer from LL conditions (*i.e.* a PFD of  $30 \mu\text{mol}\cdot\text{m}^{-2}\cdot\text{s}^{-1}$ ) to HL (*i.e.* a PFD of  $300 \mu\text{mol}\cdot\text{m}^{-2}\cdot\text{s}^{-1}$ ) within 172 h. The plant lines are denoted, *a* = Col-0, *b* = *tpt-2*, *c* = *adg1-1*, *d* = *adg1-1/tpt-2*. Significance levels of  $P < 0.05$  or  $P < 0.01$  are indicated by light or dark blue colours.

| Conditions | ETR  |               |               |               |               |               | $F_v/F_m$     |               |               |               |               |               |               |
|------------|------|---------------|---------------|---------------|---------------|---------------|---------------|---------------|---------------|---------------|---------------|---------------|---------------|
|            | Time | <i>a vs b</i> | <i>a vs c</i> | <i>a vs d</i> | <i>b vs c</i> | <i>b vs d</i> | <i>c vs d</i> | <i>a vs b</i> | <i>a vs c</i> | <i>a vs d</i> | <i>b vs c</i> | <i>b vs d</i> | <i>c vs d</i> |
| $t_0$ (LL) |      |               |               |               |               |               |               |               |               |               |               |               |               |
| 3h         |      |               |               |               |               |               |               |               |               |               |               |               |               |
| 6h         |      |               |               |               |               |               |               |               |               |               |               |               |               |
| 24h        |      |               |               |               |               |               |               |               |               |               |               |               |               |
| 29h        |      |               |               |               |               |               |               |               |               |               |               |               |               |
| 48h        |      |               |               |               |               |               |               |               |               |               |               |               |               |
| 53h        |      |               |               |               |               |               |               |               |               |               |               |               |               |
| 72h        |      |               |               |               |               |               |               |               |               |               |               |               |               |
| 78h        |      |               |               |               |               |               |               |               |               |               |               |               |               |
| 120h       |      |               |               |               |               |               |               |               |               |               |               |               |               |
| 148h       |      |               |               |               |               |               |               |               |               |               |               |               |               |
| 172h       |      |               |               |               |               |               |               |               |               |               |               |               |               |

**Document S1 (Table 2).** Statistical analysis (ANOVA/Tukey-Kramer) of starch, soluble sugar, and anthocyanin levels of wild-type and mutant plants in a time series after transfer from LL conditions (*i.e.* a PFD of  $30 \mu\text{mol}\cdot\text{m}^{-2}\cdot\text{s}^{-1}$ ) to HL (*i.e.* a PFD of  $300 \mu\text{mol}\cdot\text{m}^{-2}\cdot\text{s}^{-1}$ ) within 148 min. The plant lines are denoted, *a* = Col-0, *b* = *tpt-2*, *c* = *adg1-1*, *d* = *adg1-1/tpt-2*. Significance levels of  $P < 0.05$  or  $P < 0.01$  are indicated by light or dark blue colours.

| Condition                  |  | Starch               |                      |                      |                      |                      |                      | Sucrose              |                      |                      |                      |                      |                      | Glucose              |                      |                      |                      |                      |                      | Fructose             |                      |                      |                      |                      |                      | Condition |                            | Anthocyanin          |                      |                      |                      |                      |                      |  |  |
|----------------------------|--|----------------------|----------------------|----------------------|----------------------|----------------------|----------------------|----------------------|----------------------|----------------------|----------------------|----------------------|----------------------|----------------------|----------------------|----------------------|----------------------|----------------------|----------------------|----------------------|----------------------|----------------------|----------------------|----------------------|----------------------|-----------|----------------------------|----------------------|----------------------|----------------------|----------------------|----------------------|----------------------|--|--|
| Time                       |  | <i>a</i> vs <i>b</i> | <i>a</i> vs <i>c</i> | <i>a</i> vs <i>d</i> | <i>b</i> vs <i>c</i> | <i>b</i> vs <i>d</i> | <i>c</i> vs <i>d</i> | <i>a</i> vs <i>b</i> | <i>a</i> vs <i>c</i> | <i>a</i> vs <i>d</i> | <i>b</i> vs <i>c</i> | <i>b</i> vs <i>d</i> | <i>c</i> vs <i>d</i> | <i>a</i> vs <i>b</i> | <i>a</i> vs <i>c</i> | <i>a</i> vs <i>d</i> | <i>b</i> vs <i>c</i> | <i>b</i> vs <i>d</i> | <i>c</i> vs <i>d</i> | <i>a</i> vs <i>b</i> | <i>a</i> vs <i>c</i> | <i>a</i> vs <i>d</i> | <i>b</i> vs <i>c</i> | <i>b</i> vs <i>d</i> | <i>c</i> vs <i>d</i> | Time      |                            | <i>a</i> vs <i>b</i> | <i>a</i> vs <i>c</i> | <i>a</i> vs <i>d</i> | <i>b</i> vs <i>c</i> | <i>b</i> vs <i>d</i> | <i>c</i> vs <i>d</i> |  |  |
| <i>t</i> <sub>0</sub> (LL) |  |                      |                      |                      |                      |                      |                      |                      |                      |                      |                      |                      |                      |                      |                      |                      |                      |                      |                      |                      |                      |                      |                      |                      |                      |           | <i>t</i> <sub>0</sub> (LL) |                      |                      |                      |                      |                      |                      |  |  |
| 30 min                     |  |                      |                      |                      |                      |                      |                      |                      |                      |                      |                      |                      |                      |                      |                      |                      |                      |                      |                      |                      |                      |                      |                      |                      |                      |           | 4 h                        |                      |                      |                      |                      |                      |                      |  |  |
| 60 min                     |  |                      |                      |                      |                      |                      |                      |                      |                      |                      |                      |                      |                      |                      |                      |                      |                      |                      |                      |                      |                      |                      |                      |                      |                      |           | 8 h                        |                      |                      |                      |                      |                      |                      |  |  |
| 120 min                    |  |                      |                      |                      |                      |                      |                      |                      |                      |                      |                      |                      |                      |                      |                      |                      |                      |                      |                      |                      |                      |                      |                      |                      |                      |           | 24 h                       |                      |                      |                      |                      |                      |                      |  |  |
| 240 min                    |  |                      |                      |                      |                      |                      |                      |                      |                      |                      |                      |                      |                      |                      |                      |                      |                      |                      |                      |                      |                      |                      |                      |                      |                      |           | 32 h                       |                      |                      |                      |                      |                      |                      |  |  |
| 480 min                    |  |                      |                      |                      |                      |                      |                      |                      |                      |                      |                      |                      |                      |                      |                      |                      |                      |                      |                      |                      |                      |                      |                      |                      |                      |           | HL                         |                      |                      |                      |                      |                      |                      |  |  |
| HL                         |  |                      |                      |                      |                      |                      |                      |                      |                      |                      |                      |                      |                      |                      |                      |                      |                      |                      |                      |                      |                      |                      |                      |                      |                      |           | HL                         |                      |                      |                      |                      |                      |                      |  |  |

**Document S1 (Table 3).** Statistical analysis (ANOVA/Tukey-Kramer) of MgProtoIX contents and Lhcb1 transcript abundance of wild-type and mutant plants in a time series after transfer from LL conditions (*i.e.* a PFD of 30  $\mu\text{mol}\cdot\text{m}^{-2}\cdot\text{s}^{-1}$ ) to HL (*i.e.* a PFD of 300  $\mu\text{mol}\cdot\text{m}^{-2}\cdot\text{s}^{-1}$ ) within 480 min. The plant lines are denoted, *a* = Col-0; *b* = *tpt-2*, *c* = *adg1-1*, *d* = *adg1-1/tpt-2*. Significance levels of  $P < 0.05$  or  $P < 0.01$  are indicated by light or dark blue colours.

| Conditions          | MgProtoIX     |               |               |               |               |               | Lhcb2         |               |               |               |               |               |
|---------------------|---------------|---------------|---------------|---------------|---------------|---------------|---------------|---------------|---------------|---------------|---------------|---------------|
|                     | <i>a vs b</i> | <i>a vs c</i> | <i>a vs d</i> | <i>b vs c</i> | <i>b vs d</i> | <i>c vs d</i> | <i>a vs b</i> | <i>a vs c</i> | <i>a vs d</i> | <i>b vs c</i> | <i>b vs d</i> | <i>c vs d</i> |
| HL                  |               | Dark Blue     | Dark Blue     | Light Blue    | Dark Blue     |               | Dark Blue     | Dark Blue     | Dark Blue     | Dark Blue     | Dark Blue     | Dark Blue     |
| LL                  |               |               |               |               |               |               | Dark Blue     |               | Light Blue    |               |               |               |
| t <sub>30min</sub>  |               |               |               |               |               |               | Dark Blue     | Dark Blue     | Dark Blue     | Dark Blue     | Dark Blue     |               |
| t <sub>60min</sub>  |               |               |               |               |               |               |               |               |               |               |               |               |
| t <sub>240min</sub> |               |               |               |               |               |               | Dark Blue     | Dark Blue     |               |               | Dark Blue     | Dark Blue     |
| t <sub>480min</sub> |               |               | Light Blue    |               |               |               | Dark Blue     | Dark Blue     | Dark Blue     | Dark Blue     | Dark Blue     | Dark Blue     |

**Document S1 (Table 4).** Statistical analysis (ANOVA/Tukey-Kramer) of contents of redox components of wild-type and mutant plants in a time series after transfer from LL conditions (*i.e.* a PFD of 30  $\mu\text{mol}\cdot\text{m}^{-2}\cdot\text{s}^{-1}$ ) to HL (*i.e.* a PFD of 300  $\mu\text{mol}\cdot\text{m}^{-2}\cdot\text{s}^{-1}$ ) within 4h compared to HL grown plants. The biotypes are denoted, *a* = Col-0; *b* = *tpt-2*, *c* = *adg1-1*, *d* = *adg1-1/tpt-2*. Significance levels of  $P < 0.05$  or  $P < 0.01$  are indicated by light or dark blue colours.

| Compound  | Conditions | <i>a</i> vs <i>b</i> | <i>a</i> vs <i>c</i> | <i>a</i> vs <i>d</i> | <i>b</i> vs <i>c</i> | <i>b</i> vs <i>d</i> | <i>c</i> vs <i>d</i> |
|-----------|------------|----------------------|----------------------|----------------------|----------------------|----------------------|----------------------|
| DHA       | $t_0$      |                      |                      |                      |                      |                      |                      |
|           | $t_4$      |                      |                      |                      |                      |                      |                      |
|           | HL         |                      |                      |                      |                      |                      |                      |
| Asc       | $t_0$      |                      |                      |                      |                      |                      |                      |
|           | $t_{4h}$   |                      |                      |                      |                      |                      |                      |
|           | HL         |                      |                      |                      |                      |                      |                      |
| DHA + ASC | $t_0$      |                      |                      |                      |                      |                      |                      |
|           | $t_4$      |                      |                      |                      |                      |                      |                      |
|           | HL         |                      |                      |                      |                      |                      |                      |
| GSSG      | $t_0$      |                      |                      |                      |                      |                      |                      |
|           | $t_{4h}$   |                      |                      |                      |                      |                      |                      |
|           | HL         |                      |                      |                      |                      |                      |                      |
| GSH       | $t_0$      |                      |                      |                      |                      |                      |                      |
|           | $t_{4h}$   |                      |                      |                      |                      |                      |                      |
|           | HL         |                      |                      |                      |                      |                      |                      |
| GSSG+GSH  | $t_0$      |                      |                      |                      |                      |                      |                      |
|           | $t_{4h}$   |                      |                      |                      |                      |                      |                      |
|           | HL         |                      |                      |                      |                      |                      |                      |

**Document S1 (Table 5).** Statistical analysis (ANOVA/Tukey-Kramer) of metabolite contents of wild-type and mutant plants in a time series after transfer from LL conditions (*i.e.* a PFD of  $30 \mu\text{mol}\cdot\text{m}^{-2}\cdot\text{s}^{-1}$ ) to HL (*i.e.* a PFD of  $300 \mu\text{mol}\cdot\text{m}^{-2}\cdot\text{s}^{-1}$ ) within 4h and 48h compared to HL- or LL-grown plants. The conditions are denoted,  $a = t_0$  (LL);  $b = t_{4h}$  (HL),  $c = t_{48h}$  (HL),  $d = \text{HL}$ . Significance levels of  $P < 0.05$  or  $P < 0.01$  are indicated by light or dark blue colours.

| Metabolites                                   | Col-0  |        |        |        |        |        | tpt-2  |        |        |        |        |        | adg1-1 |        |        |        |        |        | adg1-1/tpt-2 |        |        |        |        |        |
|-----------------------------------------------|--------|--------|--------|--------|--------|--------|--------|--------|--------|--------|--------|--------|--------|--------|--------|--------|--------|--------|--------------|--------|--------|--------|--------|--------|
|                                               | a vs b | a vs c | a vs d | b vs c | b vs d | c vs d | a vs b | a vs c | a vs d | b vs c | b vs d | c vs d | a vs b | a vs c | a vs d | b vs c | b vs d | c vs d | a vs b       | a vs c | a vs d | b vs c | b vs d | c vs d |
| Sucrose, D- (8TMS)                            |        |        |        |        |        |        |        |        |        |        |        |        |        |        |        |        |        |        |              |        |        |        |        |        |
| Glucose, D- (1MEOX) (5TMS)                    |        |        |        |        |        |        |        |        |        |        |        |        |        |        |        |        |        |        |              |        |        |        |        |        |
| Fructose, D- (1MEOX) (5TMS)                   |        |        |        |        |        |        |        |        |        |        |        |        |        |        |        |        |        |        |              |        |        |        |        |        |
| Mannose, D- (1MEOX) (5TMS)                    |        |        |        |        |        |        |        |        |        |        |        |        |        |        |        |        |        |        |              |        |        |        |        |        |
| Maltose, D- (1MEOX) (8TMS)                    |        |        |        |        |        |        |        |        |        |        |        |        |        |        |        |        |        |        |              |        |        |        |        |        |
| Trehalose, alpha,alpha'-, D- (8TMS)           |        |        |        |        |        |        |        |        |        |        |        |        |        |        |        |        |        |        |              |        |        |        |        |        |
| Raffinose (11TMS)                             |        |        |        |        |        |        |        |        |        |        |        |        |        |        |        |        |        |        |              |        |        |        |        |        |
| Glucose, 1,6-anhydro, beta-D- (3TMS)          |        |        |        |        |        |        |        |        |        |        |        |        |        |        |        |        |        |        |              |        |        |        |        |        |
| Mannopyranoside, 1-O-methyl-, alpha-D- (4TMS) |        |        |        |        |        |        |        |        |        |        |        |        |        |        |        |        |        |        |              |        |        |        |        |        |
| Fucose, DL- (1MEOX) (4TMS)                    |        |        |        |        |        |        |        |        |        |        |        |        |        |        |        |        |        |        |              |        |        |        |        |        |
| Arabinose, D- (1MEOX) (4TMS)                  |        |        |        |        |        |        |        |        |        |        |        |        |        |        |        |        |        |        |              |        |        |        |        |        |
| Glucoheptose (1MEOX) (6TMS)                   |        |        |        |        |        |        |        |        |        |        |        |        |        |        |        |        |        |        |              |        |        |        |        |        |



**Document S1 (Table 5), continued**

| Amino acids                       |   |   |   |   |   |   |   |   |   |   |   |   |   |   |   |   |   |   |   |   |   |   |   |   |
|-----------------------------------|---|---|---|---|---|---|---|---|---|---|---|---|---|---|---|---|---|---|---|---|---|---|---|---|
| Pyroglutamic acid / Glutamic acid | ■ | ■ |   | ■ | ■ | ■ | ■ | ■ | ■ | ■ |   | ■ | ■ | ■ |   | ■ | ■ | ■ | ■ | ■ |   |   | ■ | ■ |
| Aspartic acid, L- (3TMS)          |   | ■ |   | ■ |   | ■ |   | ■ |   |   |   |   |   | ■ |   | ■ | ■ | ■ |   |   |   |   |   |   |
| Asparagine, DL- (3TMS)            |   |   |   |   |   |   |   | ■ |   | ■ |   | ■ |   | ■ |   | ■ |   | ■ |   |   | ■ |   | ■ | ■ |
| Alanine, DL- (3TMS)               |   | ■ |   |   | ■ | ■ |   | ■ |   | ■ |   | ■ |   | ■ |   | ■ |   | ■ | ■ | ■ |   |   | ■ | ■ |
| Glycine (3TMS)                    | ■ | ■ | ■ | ■ | ■ | ■ | ■ | ■ | ■ |   | ■ | ■ | ■ | ■ | ■ | ■ | ■ | ■ | ■ | ■ |   | ■ | ■ |   |
| Serine, DL- (3TMS)                | ■ | ■ | ■ | ■ | ■ | ■ | ■ | ■ | ■ |   |   |   | ■ | ■ | ■ | ■ |   | ■ | ■ | ■ | ■ |   | ■ |   |
| Threonine, DL- (3TMS)             | ■ | ■ |   | ■ | ■ | ■ | ■ | ■ | ■ |   |   | ■ |   | ■ |   | ■ |   | ■ | ■ |   | ■ | ■ |   | ■ |
| Cysteine, DL- (3TMS)              |   | ■ | ■ | ■ |   |   |   | ■ | ■ | ■ |   |   |   | ■ | ■ | ■ | ■ | ■ |   | ■ |   | ■ |   | ■ |
| Methionine, DL- (2TMS)            |   |   |   |   |   |   | ■ | ■ |   |   | ■ | ■ | ■ | ■ |   |   | ■ | ■ | ■ |   |   |   | ■ |   |
| Isoleucine, L- (2TMS)             | ■ | ■ | ■ |   |   |   | ■ | ■ | ■ |   |   |   | ■ | ■ | ■ |   |   |   | ■ | ■ | ■ |   | ■ | ■ |
| Valine, DL- (2TMS)                | ■ | ■ | ■ |   | ■ | ■ | ■ | ■ | ■ | ■ |   | ■ | ■ | ■ | ■ | ■ |   | ■ | ■ | ■ |   |   | ■ | ■ |
| Lysine, L- (4TMS)                 | ■ | ■ |   |   |   | ■ | ■ | ■ | ■ |   |   |   | ■ | ■ | ■ | ■ |   | ■ | ■ | ■ |   |   |   |   |
| Arginine, DL-, -NH3 (3TMS)        |   |   |   |   |   |   |   | ■ | ■ | ■ |   | ■ |   | ■ |   | ■ |   | ■ | ■ | ■ |   |   | ■ | ■ |
| Phenylalanine, DL- (2TMS)         | ■ | ■ |   | ■ | ■ |   | ■ | ■ | ■ | ■ |   | ■ | ■ | ■ |   | ■ | ■ | ■ | ■ | ■ |   | ■ | ■ | ■ |
| Tyrosine, DL- (3TMS)              | ■ | ■ |   |   | ■ | ■ | ■ | ■ | ■ | ■ | ■ | ■ | ■ | ■ |   | ■ |   | ■ | ■ | ■ | ■ |   |   |   |
| Tryptophan, L- (2TMS)             | ■ | ■ | ■ |   |   |   | ■ | ■ |   |   |   | ■ | ■ | ■ | ■ |   |   |   |   | ■ |   |   |   | ■ |
| Proline, L- (2TMS)                | ■ | ■ |   | ■ | ■ | ■ | ■ | ■ | ■ | ■ |   | ■ | ■ | ■ |   | ■ |   | ■ | ■ | ■ |   |   | ■ | ■ |
| Alanine, beta- (3TMS)             | ■ | ■ | ■ | ■ |   | ■ | ■ | ■ | ■ | ■ |   | ■ |   | ■ | ■ | ■ |   | ■ |   | ■ | ■ | ■ | ■ | ■ |

**Document S1 (Table 5), continued**

| Organic acids                     |  |  |  |  |  |  |  |  |  |  |  |  |  |  |  |  |  |  |  |  |  |  |  |  |  |  |  |  |  |  |  |  |  |  |  |  |  |  |  |
|-----------------------------------|--|--|--|--|--|--|--|--|--|--|--|--|--|--|--|--|--|--|--|--|--|--|--|--|--|--|--|--|--|--|--|--|--|--|--|--|--|--|--|
| Pyruvic acid (1MEOX) (1TMS)       |  |  |  |  |  |  |  |  |  |  |  |  |  |  |  |  |  |  |  |  |  |  |  |  |  |  |  |  |  |  |  |  |  |  |  |  |  |  |  |
| Malic acid, 2-methyl-, DL- (3TMS) |  |  |  |  |  |  |  |  |  |  |  |  |  |  |  |  |  |  |  |  |  |  |  |  |  |  |  |  |  |  |  |  |  |  |  |  |  |  |  |
| Glutaric acid (2TMS)              |  |  |  |  |  |  |  |  |  |  |  |  |  |  |  |  |  |  |  |  |  |  |  |  |  |  |  |  |  |  |  |  |  |  |  |  |  |  |  |
| Succinic acid (2TMS)              |  |  |  |  |  |  |  |  |  |  |  |  |  |  |  |  |  |  |  |  |  |  |  |  |  |  |  |  |  |  |  |  |  |  |  |  |  |  |  |
| Fumaric acid (2TMS)               |  |  |  |  |  |  |  |  |  |  |  |  |  |  |  |  |  |  |  |  |  |  |  |  |  |  |  |  |  |  |  |  |  |  |  |  |  |  |  |
| Malonic acid (2TMS)               |  |  |  |  |  |  |  |  |  |  |  |  |  |  |  |  |  |  |  |  |  |  |  |  |  |  |  |  |  |  |  |  |  |  |  |  |  |  |  |
| Glyceric acid, DL- (3TMS)         |  |  |  |  |  |  |  |  |  |  |  |  |  |  |  |  |  |  |  |  |  |  |  |  |  |  |  |  |  |  |  |  |  |  |  |  |  |  |  |
| Butyric acid, 3-hydroxy- (2TMS)   |  |  |  |  |  |  |  |  |  |  |  |  |  |  |  |  |  |  |  |  |  |  |  |  |  |  |  |  |  |  |  |  |  |  |  |  |  |  |  |
| Gluconic/Galactonic acid (6TMS)   |  |  |  |  |  |  |  |  |  |  |  |  |  |  |  |  |  |  |  |  |  |  |  |  |  |  |  |  |  |  |  |  |  |  |  |  |  |  |  |
| Benzoic acid (1TMS)               |  |  |  |  |  |  |  |  |  |  |  |  |  |  |  |  |  |  |  |  |  |  |  |  |  |  |  |  |  |  |  |  |  |  |  |  |  |  |  |



**Document S1 (Table 6).** Statistical analysis (ANOVA/Tukey-Kramer) of metabolite contents of wild-type and mutant plants in a time series after transfer from LL conditions (*i.e.* a PFD of  $30 \mu\text{mol}\cdot\text{m}^{-2}\cdot\text{s}^{-1}$ ) to HL (*i.e.* a PFD of  $300 \mu\text{mol}\cdot\text{m}^{-2}\cdot\text{s}^{-1}$ ) within 4h and 48h compared to HL- or LL-grown plants. The plant lines are denoted, *a* = Col-0; *b* = *tpt-2*, *c* = *adg1-1*, *d* = *adg1-1/tpt-2*. Significance levels of  $P < 0.05$  or  $P < 0.01$  are indicated by light or dark blue colours.

| Metabolites                                   | $t_0$ (LL)    |               |               |               |               |               | $t_{4h}$ (HL) |               |               |               |               |               | $t_{48h}$ (HL) |               |               |               |               |               | HL            |               |               |               |               |               |
|-----------------------------------------------|---------------|---------------|---------------|---------------|---------------|---------------|---------------|---------------|---------------|---------------|---------------|---------------|----------------|---------------|---------------|---------------|---------------|---------------|---------------|---------------|---------------|---------------|---------------|---------------|
|                                               | <i>a vs b</i> | <i>a vs c</i> | <i>a vs d</i> | <i>b vs c</i> | <i>b vs d</i> | <i>c vs d</i> | <i>a vs b</i> | <i>a vs c</i> | <i>a vs d</i> | <i>b vs c</i> | <i>b vs d</i> | <i>c vs d</i> | <i>a vs b</i>  | <i>a vs c</i> | <i>a vs d</i> | <i>b vs c</i> | <i>b vs d</i> | <i>c vs d</i> | <i>a vs b</i> | <i>a vs c</i> | <i>a vs d</i> | <i>b vs c</i> | <i>b vs d</i> | <i>c vs d</i> |
| Sucrose, D- (8TMS)                            |               |               |               |               |               |               |               |               |               |               |               |               |                |               |               |               |               |               |               |               |               |               |               |               |
| Glucose, D- (1MEOX) (5TMS)                    |               |               |               |               |               |               |               |               |               |               |               |               |                |               |               |               |               |               |               |               |               |               |               |               |
| Fructose, D- (1MEOX) (5TMS)                   |               |               |               |               |               |               |               |               |               |               |               |               |                |               |               |               |               |               |               |               |               |               |               |               |
| Mannose, D- (1MEOX) (5TMS)                    |               |               |               |               |               |               |               |               |               |               |               |               |                |               |               |               |               |               |               |               |               |               |               |               |
| Maltose, D- (1MEOX) (8TMS)                    |               |               |               |               |               |               |               |               |               |               |               |               |                |               |               |               |               |               |               |               |               |               |               |               |
| Trehalose, alpha,alpha'-, D- (8TMS)           |               |               |               |               |               |               |               |               |               |               |               |               |                |               |               |               |               |               |               |               |               |               |               |               |
| Raffinose (11TMS)                             |               |               |               |               |               |               |               |               |               |               |               |               |                |               |               |               |               |               |               |               |               |               |               |               |
| Glucose, 1,6-anhydro, beta-D- (3TMS)          |               |               |               |               |               |               |               |               |               |               |               |               |                |               |               |               |               |               |               |               |               |               |               |               |
| Mannopyranoside, 1-O-methyl-, alpha-D- (4TMS) |               |               |               |               |               |               |               |               |               |               |               |               |                |               |               |               |               |               |               |               |               |               |               |               |
| Fucose, DL- (1MEOX) (4TMS)                    |               |               |               |               |               |               |               |               |               |               |               |               |                |               |               |               |               |               |               |               |               |               |               |               |
| Arabinose, D- (1MEOX) (4TMS)                  |               |               |               |               |               |               |               |               |               |               |               |               |                |               |               |               |               |               |               |               |               |               |               |               |
| Glucoheptose (1MEOX) (6TMS)                   |               |               |               |               |               |               |               |               |               |               |               |               |                |               |               |               |               |               |               |               |               |               |               |               |

**Document S1 (Table 6), continued**

| Amino acids                       |   |   |   |   |   |   |   |   |   |   |   |   |   |   |   |   |   |   |   |   |   |   |   |   |
|-----------------------------------|---|---|---|---|---|---|---|---|---|---|---|---|---|---|---|---|---|---|---|---|---|---|---|---|
| Pyroglutamic acid / Glutamic acid | ■ |   |   | ■ | ■ |   | ■ | ■ | ■ | ■ | ■ |   |   |   | ■ |   | ■ | ■ | ■ |   |   | ■ | ■ |   |
| Aspartic acid, L- (3TMS)          | ■ |   |   | ■ |   | ■ | ■ |   | ■ | ■ | ■ | ■ |   |   |   | ■ |   |   | ■ |   | ■ | ■ |   | ■ |
| Asparagine, DL- (3TMS)            |   | ■ |   | ■ |   | ■ | ■ | ■ | ■ |   |   |   |   | ■ |   | ■ |   | ■ |   |   |   |   |   |   |
| Alanine, DL- (3TMS)               | ■ |   |   | ■ |   |   |   |   | ■ |   | ■ | ■ | ■ | ■ |   |   | ■ | ■ | ■ | ■ | ■ | ■ | ■ |   |
| Glycine (3TMS)                    |   | ■ | ■ |   | ■ | ■ | ■ | ■ | ■ | ■ | ■ | ■ |   |   | ■ | ■ | ■ | ■ | ■ | ■ | ■ | ■ | ■ | ■ |
| Serine, DL- (3TMS)                | ■ | ■ | ■ | ■ | ■ |   | ■ |   | ■ | ■ | ■ | ■ | ■ |   | ■ | ■ | ■ | ■ | ■ | ■ | ■ | ■ | ■ | ■ |
| Threonine, DL- (3TMS)             | ■ | ■ | ■ |   | ■ | ■ | ■ |   | ■ | ■ | ■ | ■ | ■ |   | ■ |   | ■ | ■ | ■ |   | ■ | ■ | ■ | ■ |
| Cysteine, DL- (3TMS)              |   | ■ |   | ■ |   |   |   |   |   |   |   |   |   | ■ |   | ■ |   | ■ |   | ■ |   | ■ |   | ■ |
| Methionine, DL- (2TMS)            |   |   |   |   | ■ |   |   |   |   |   |   |   |   |   | ■ |   | ■ | ■ |   |   | ■ | ■ |   |   |
| Isoleucine, L- (2TMS)             | ■ |   | ■ |   | ■ | ■ |   |   |   |   |   |   |   |   |   | ■ | ■ |   |   | ■ | ■ |   |   |   |
| Valine, DL- (2TMS)                | ■ |   | ■ | ■ |   | ■ |   |   |   |   |   |   | ■ |   |   | ■ | ■ | ■ |   |   |   | ■ | ■ |   |
| Lysine, L- (4TMS)                 |   | ■ | ■ |   | ■ | ■ |   |   |   |   |   |   |   | ■ |   | ■ |   | ■ | ■ |   |   |   |   |   |
| Arginine, DL-, -NH3 (3TMS)        |   |   |   | ■ |   |   |   |   |   |   |   |   |   | ■ |   | ■ |   | ■ | ■ | ■ |   |   | ■ | ■ |
| Phenylalanine, DL- (2TMS)         |   | ■ | ■ | ■ | ■ | ■ | ■ | ■ | ■ |   | ■ | ■ |   | ■ |   | ■ |   | ■ | ■ | ■ |   |   | ■ | ■ |
| Tyrosine, DL- (3TMS)              |   | ■ |   | ■ |   | ■ | ■ |   | ■ | ■ | ■ |   | ■ |   | ■ | ■ | ■ |   |   |   |   |   | ■ |   |
| Tryptophan, L- (2TMS)             |   |   |   | ■ |   | ■ |   |   |   |   |   |   |   | ■ | ■ |   |   |   | ■ | ■ | ■ |   |   |   |
| Proline, L- (2TMS)                |   |   |   |   |   |   | ■ |   |   | ■ | ■ |   |   | ■ | ■ |   | ■ | ■ |   |   | ■ | ■ |   |   |
| Alanine, beta- (3TMS)             |   | ■ | ■ | ■ | ■ | ■ |   |   |   |   |   |   | ■ |   |   |   |   | ■ | ■ |   |   | ■ | ■ |   |

**Document S1 (Table 6), continued**

| Organic acids                     |            |            |            |            |            |            |      |            |            |            |            |      |            |            |            |      |      |            |            |      |            |            |            |            |
|-----------------------------------|------------|------------|------------|------------|------------|------------|------|------------|------------|------------|------------|------|------------|------------|------------|------|------|------------|------------|------|------------|------------|------------|------------|
| Pyruvic acid (1MEOX) (1TMS)       | Light Blue |            |            | Blue       |            |            | Blue |            | Light Blue | Blue       | Blue       | Blue |            |            |            |      |      |            | Blue       |      |            | Light Blue | Blue       | Light Blue |
| Malic acid, 2-methyl-, DL- (3TMS) | Blue       |            | Blue       | Light Blue |            |            |      |            |            |            |            |      | Light Blue |            | Blue       |      | Blue | Blue       |            |      | Blue       |            | Blue       | Blue       |
| Glutaric acid (2TMS)              |            | Blue       | Blue       |            |            |            |      |            |            |            |            |      |            |            | Blue       |      | Blue | Blue       | Blue       | Blue | Blue       |            | Blue       | Blue       |
| Succinic acid (2TMS)              | Blue       | Blue       | Blue       | Blue       | Blue       |            | Blue | Blue       | Blue       |            |            |      | Blue       | Blue       | Blue       | Blue | Blue | Blue       | Blue       |      | Blue       | Blue       | Blue       | Blue       |
| Fumaric acid (2TMS)               |            | Blue       |            | Blue       | Blue       | Blue       | Blue | Blue       | Blue       | Blue       | Blue       | Blue | Blue       | Light Blue | Blue       |      |      | Light Blue |            |      | Blue       |            | Blue       | Blue       |
| Malonic acid (2TMS)               | Light Gray | Light Gray | Light Gray | Light Gray | Light Gray | Light Gray |      | Light Blue |            | Light Blue |            |      |            |            |            |      |      |            |            |      |            |            |            |            |
| Glyceric acid, DL- (3TMS)         | Blue       | Blue       | Blue       | Blue       | Blue       |            | Blue |            | Blue       | Blue       | Blue       | Blue | Blue       | Light Blue | Blue       | Blue | Blue | Blue       |            | Blue | Blue       | Blue       | Blue       | Blue       |
| Butyric acid, 3-hydroxy- (2TMS)   | Blue       | Light Blue | Light Blue | Blue       |            | Blue       |      |            |            | Light Blue |            |      |            |            | Light Blue |      | Blue |            |            |      |            |            | Light Blue |            |
| Gluconic/Galactonic acid (6TMS)   |            | Blue       | Light Blue | Blue       | Light Blue |            |      |            |            |            |            |      |            |            |            |      |      |            |            |      | Light Blue | Blue       | Blue       |            |
| Benzoic acid (1TMS)               |            | Light Blue |            | Blue       |            | Blue       |      |            |            |            | Light Blue |      |            |            | Blue       |      | Blue | Light Blue | Light Blue |      |            |            | Blue       |            |



## Supplementary Document S2

### Static assessment of global gene expression after LL/HL-transfer

#### (A) *adg1-1* vs Col-0

The starch-free *adg1-1* single mutant contained the highest number of significantly altered genes in the static comparison, particularly under LL-conditions (Fig. 6A) or 48h after LL/HL-transfer. Under LL-conditions 16 genes belonging to the category 'protein metabolism' were differentially regulated as a part of the 144 highly altered genes. Interestingly, among these 16 genes, 12 genes related to 'protein degradation' were down-regulated and four genes related to 'protein synthesis' were up-regulated (Tables 1, Supplementary Table S2A), suggesting that in the absence of starch the maintenance of protein abundance is promoted.

The transfer from LL to HL had a profound impact on the functional categories of altered genes in the *adg1-1* single mutant. Although the number of differentially regulated genes dropped 4h after transfer to HL, 30 and 17 genes were up- and down-regulated, respectively, compared to the wild type (Table 1, Supplementary Table S3A). Among the 30 up-regulated genes, there were five genes related to 'lipid metabolism'. Four of the five proteins reside in chloroplasts. Furthermore, four genes involved in 'secondary metabolism' (flavonoid biosynthesis) were up-regulated and five genes related to 'stress' were down-regulated (Table 1, Supplementary Table S3A). These data suggest an elevated input into lipid formation and/or secondary metabolism as a consequence of a deficiency in the night-path of photoassimilate export from the chloroplast.

The functional pattern of genes changed appreciably after 48h in HL (Fig. 6, Table 1, Supplementary Table S4A). There were a total of 209 genes specifically altered in *adg1-1* compared to the wild type. Interestingly, although the category 'lipid metabolism' was missing among the 58 highly up-regulated genes, there were seven genes belonging to this category among the 151 highly down-regulated genes, with four of these genes related to 'lipid degradation'. Hence, the transient enhancement of lipid synthesis (i.e. 4h after LL/HL-transfer) was replaced by an inhibition of lipid degradation in the long term. Furthermore five genes involved in 'major CHO metabolism', 12 genes related to 'proteins' (including seven genes connected to 'protein synthesis'), as well as six genes related to 'regulation of transcription (RT)' were highly up-regulated (Table 1). Moreover, the up-regulation of genes involved in 'protein synthesis' was accompanied by a down-regulation of 13 genes related to 'protein degradation', again suggesting an enhanced production and/or maintenance of proteins. Furthermore 21, 11, and seven genes related to 'RT', 'stress' and 'signalling',



respectively, were highly down-regulated in *adg1-1* 48h after LL/HL-transfer (Supplementary Table S4A). Moreover, the gene coding for the glucose 6-phosphate/phosphate translocator 2 (*GPT2*; At1g61800) was highly up-regulated in *adg1-1*.

### **(B) *tpt-2* vs Col-0**

Under LL-conditions, a limitation in the day-path of photoassimilate export from the chloroplast in the *tpt-2* mutant resulted only in the down-regulation of a single gene encoding a disulfide isomerase-like protein (AtPDIL 5-4, At4g27080; Supplementary Table S2B).

The number of highly altered genes in *tpt-2* was increased to 36, 4h after the plants were transferred to HL. There were only two genes down-regulated, amongst them again AtPDIL 5-4 and a protein of unknown function (At4g27080; Supplementary Table S3B). The 34 highly up-regulated genes comprised three genes related to 'major carbohydrate metabolism' and seven, significantly over-represented genes involved in 'protein degradation' (Table 1). After 48h in HL, again, there were more genes highly up-regulated (104) than down-regulated (3) (Supplementary Table S4B). Interestingly, AtPDIL 5-4 still belonged to the down-regulated genes. Within the group of up-regulated genes there were three significantly over-represented functional clusters, *i.e.* 'cell wall', 'hormone metabolism' and 'stress' (Table 1). Furthermore, genes related to 'RT' and 'development' were represented with at least five members. Ten genes, including a MAPkinase (At1g01560), were connected to 'signalling', in particular, 'calcium signalling' (nine genes).

### **(c) *adg1-1/tpt-2* vs Col-0**

Despite the relative high number of specifically altered genes in the *adg1-1* mutant, surprisingly, the combined deficiency in the day- and night-path of photoassimilate export resulted in an appreciable lower number of differentially regulated genes in *adg1-1/tpt-2*. Under LL-conditions there were only 21 genes highly up- or down-regulated in the double mutant (Supplementary Table S2C). Among the nine up-regulated genes in *adg1-1/tpt-2*, remarkably, there were three genes related to 'abiotic stress', sub-category heat. All three genes belong to the putative HSP20-type protein of unknown function (At1g53540, At3g46230, At5g12020). Of the 12 down-regulated genes one half is related to 'histone proteins' and 'chromatin structure', suggesting that parts of the DNA was not associated with proteins and/or the plants contained less DNA. The only gene dramatically down-regulated in the overlapping area of *adg1-1/tpt-2* and *tpt-2* was, as expected, the *TPT* gene (Supplementary Table S2D). In the overlapping region between *adg1-1/tpt-2* and *adg1-1*

there were 13 up- and 33 down-regulated genes found. Among the down-regulated genes there were six genes related to 'chromatin structure' as well as five genes involved in 'protein degradation', again suggesting a function of starch and/or soluble sugars in protein maintenance and chromatin structure.

After 4h in HL only 10 genes were highly altered in *adg1-1/tpt-2* (Fig. 6B, Supplementary Table S3C). The three up-regulated genes comprised a stress induced protein (At2g40170) involved in ABA metabolism and a chloroplast localised superoxide dismutase (At2g28190). Both genes were more pronounced up-regulated in *adg1-1/tpt-2* compared to *adg1-1* or *tpt-2*. Amongst the down-regulated genes there was a bHLH-type transcription factor (At4g17880; MYC4), which was highly and specifically down-regulated with a log<sub>2</sub>-ratio of -5.17 in *adg1-1/tpt-2*. Strikingly the same gene was also highly down-regulated after 48h in HL (log<sub>2</sub>-ratio = -4.21) and even in LL (log<sub>2</sub>-ratio = -3.68). A closer inspection of the expression profiles (eFP browser, Winter *et al.*, 2007) revealed that this gene is highly regulated by various stress conditions, like for instance oxidative stress, and it responds to jasmonate (Fernández-Calvo *et al.*, 2011). Moreover, the presence of externally fed Suc induces the expression of At4g17880. Furthermore, MYC4 has been identified to be one of the key players in the regulation of glucosinolate biosynthesis (Schweizer *et al.*, 2013). At t<sub>48h</sub> there were eight more transcriptional regulators within the group of 112 highly down-regulated genes in *adg1-1/tpt-2*. Moreover, the functional categories 'amino acids', 'cell wall', and 'major carbohydrate metabolism' were significantly over-represented (Table 1). Interestingly, among the 36 highly up-regulated genes, 22 were plastome-encoded and belonged to the categories 'PS light reaction' (16 genes), 'protein biosynthesis' (five genes) and 'lipid metabolism' (one gene). Moreover, there were four nuclear-encoded genes involved in 'RT' up-regulated in *adg1-1/tpt-2*.

### Supplementary Document S3

#### **Genes associated with `major carbohydrate`- and `lipid metabolism` as well as `transport` were commonly up-regulated 4h after LL/HL-transfer**

The group of commonly regulated genes as a response to LL/HL-transfer comprised also metabolic genes. Strikingly, seven and 11 genes associated with `lipid`- and `major CHO metabolism`, respectively, were up-regulated only transiently at  $t_{4h}$  vs  $t_0$  (Supplementary Table S7A).

Among the up-regulated genes associated with `lipid metabolism`, there were two genes involved in triacylglycerol (TAG) biosynthesis (At1g54570 and At2g19450), a sterol oxidase (At1g07420), probably anchored at the outer envelope (gene ontology, cellular component), a 16:0 delta9 desaturase (At2g31360) and a phospholipase A2 family protein (At2g06925). As an analysis with ATTED-II (version 6.1) revealed, all genes apart from a plastidial thioesterase (At1g54570) belong to a regulatory network (Supplementary Fig. S3B; Supplementary Table S7A).

Moreover, in the category `lipid metabolism` there were ten and seven genes down-regulated at  $t_{4h}$  vs  $t_0$  and  $t_{48h}$  vs  $t_0$ , respectively, with an overlap of five genes. The ten down-regulated genes at  $t_{4h}$  vs  $t_0$  form, with the exception of At5g08030, a large network (Supplementary Fig. S3C), whereas there is no evidence for any exceptional network formation with the seven down-regulated genes at  $t_{48h}$  vs  $t_0$  (not shown).

In the category `major CHO metabolism`, the 11 up-regulated genes at  $t_{4h}$  vs  $t_0$  were - in a broader sense - all involved in either starch synthesis or degradation, despite the fact that the *adg1-1* single mutant and the *adg1-1/tpt-2* double mutant lack starch (Supplementary Table S7A). Furthermore, all 11 genes belong to a single regulatory network (Supplementary Fig. S2A). The list of highly up-regulated genes comprised not only chloroplast-localised metabolic enzymes such as  $\alpha$ -amylase (At1g69830), disproportionating enzyme 1 (DPE1, At5g64860; Stettler *et al.*, 2009), isoamylase/debranching enzyme (At4g09020; Streb *et al.*, 2008; Wattedled *et al.*, 2008), branching enzyme 1 and 2 (At3g20440; At2g36390; Walters *et al.*, 2004; Dumez *et al.*, 2006) and glucan phosphorylase (At3g29320), but also regulatory proteins such as glucan water dikinase (GWD; SEX1; At1g10760; Yu *et al.*, 2001) phosphoglucan, water dikinases (PWD; AtGWD3; At5g26570; Kötting *et al.*, 2005), involved in the phosphorylation of glucose residues in amylopectin at C<sub>6</sub> and C<sub>3</sub> (Ritte *et al.*, 2006), respectively, and a protein phosphatase (AtSEX4; At3g52180), involved in the dephosphorylation of the aforementioned glucose residues (Hejazi *et al.*, 2010). Moreover,

two genes associated with the cytosolic conversion of maltose to sucrose (*i.e.* disproportionating enzyme 2 [At2g40840; Lu & Sharkey, 2004] and glucan phosphorylase 2 [At3g46970]) were highly up-regulated 4h after LL/HL-transfer in both wild-type and mutant plants. Again this regulation of genes involved in carbohydrate metabolism also occurred in the starch-free background (*i.e.* *adg1-1* and *adg1-1/tpt-2*). Interestingly, three of the starch-related genes belong to the co-expression network of phospholipase A (At2g06925; Supplementary Table S7A). Moreover, within the co-regulation network of genes belonging to the category 'major CHO metabolism', there was a chloroplast localised AMP activated protein kinase induced 4h and 48h after transfer to HL (Supplementary Table S7, A and B). The respective gene (At5g39790) appears to contain a starch binding domain (SUBA3 database; Heazlewood *et al.*, 2007; Tanz *et al.*, 2013) and might hence be involved in carbohydrate metabolism or signalling. Most strikingly, the expression of 'starch related' genes occurred independently from the presence of starch (*i.e.* in the starch-free background *adg1-1*), suggesting that the resulting proteins might have additional unknown functions.

In the category 'secondary metabolism' there were five and 11 genes up-regulated, related to 'flavonoids' in a broader sense at  $t_{4h}$  vs  $t_0$  and  $t_{48h}$  vs  $t_0$ , respectively (Supplementary Table S7, A and B). Only three of these genes were commonly differently regulated at both time points. In addition, three more up-regulated genes belonged to the sub-category 'isoprenoids' and 'miscellaneous'.

### **Genes associated with specific 'transport processes' were differentially expressed most pronounced 4h after LL/HL-transfer**

Genes associated with 'transport processes' were de-regulated both at 4h and 48h after LL/HL-transfer. Of the 14 up-regulated genes at  $t_{4h}$  vs  $t_0$ , only two genes were also found at  $t_{48h}$  vs  $t_0$ . Likewise, of the 18 down-regulated transport associated genes at  $t_{4h}$  vs  $t_0$ , only six were also found at  $t_{48h}$  vs  $t_0$  (Supplementary Table S7, A and B). Interestingly two genes belonging to the phosphate translocator family were de-regulated after 4h in HL. The glucose 6-phosphate/phosphate translocator2 (GPT2; At1g61800) and the phosphoenolpyruvate/phosphate translocator2 (PPT2; At3g01550) were up- and down-regulated, respectively. It has been demonstrated that *GPT2*, which is usually only expressed in generative tissue (eFP browser; Winter *et al.*, 2007), strongly responds to elevated soluble sugar levels (Kunz *et al.*, 2010, Schmitz *et al.*, 2012), *e.g.* in starch-free mutants or after feeding of exogenous sugars to the plants (Heinrichs *et al.*, 2012). *GPT2* was highly up-regulated with log<sub>2</sub>-ratios between 3.7 and 6.7 at  $t_{4h}$  vs  $t_0$  in all plant lines

(Supplementary Table S7). At 48h after LL-to-HL-transfer, the log<sub>2</sub>-ratios of *GPT2* expression in the wild-type and the *tpt-2* single mutant dropped to lower levels compared to  $t_{4h}$  vs  $t_0$ . However, in the *adg1-1* mutant the expression of *GPT2* was further increased from 6.7 at  $t_{4h}$  vs  $t_0$  to 7.2 at  $t_{48h}$  vs  $t_0$ , whereas in the double mutant *GPT2* was not significantly altered. The changes in the *GPT2* expression ratios in the time series correspond well with levels of soluble sugars in wild-type and mutant plants (Compare Fig. 1 and Table 4).

Of the 14 up-regulated transport-related genes, six genes encode proteins with a high probability of a mitochondrial localisation and only two are likely to be localised in the chloroplasts. The portion of organelle-localised gene products was further diminished in the group of down-regulated transport related genes (*i.e.* two mitochondrial and one plastidial).

### **Additional References (Supplementary Document S3)**

- Dumez S, Wattedled F, Dauvillee D, Delvalle D, Planchot V, Ball SG, D'Hulst C.** 2006. Mutants of Arabidopsis lacking starch branching enzyme II substitute plastidial starch synthesis by cytoplasmic maltose accumulation. *The Plant Cell* **18**, 2694-2709. <http://www.ncbi.nlm.nih.gov/pubmed/17028209>
- Heazlewood JL, Verboom RE, Tonti-Filippini J, Small I and Millar AH.** 2007. SUBA: the Arabidopsis Subcellular Database. *Nucleic Acids Research*. **35(D)**, 213-218. <http://www.ncbi.nlm.nih.gov/pubmed/17071959>
- Hejazi M, Fettke J, Kötting O, Zeeman SC, Steup M.** 2010. The Laforin-like dual-specificity phosphatase SEX4 from Arabidopsis hydrolyzes both C6- and C3-phosphate esters introduced by starch-related dikinases and thereby affects phase transition of alpha-glucans. *Plant Physiology* **152**, 711-722. <http://www.ncbi.nlm.nih.gov/pubmed/20018599>
- Kötting O, Pusch K, Tiessen A, Geigenberger P, Steup M, Ritte G.** 2005. Identification of a novel enzyme required for starch metabolism in Arabidopsis leaves. The phosphoglucan, water dikinase. *Plant Physiology* **137**, 242-252. <http://www.ncbi.nlm.nih.gov/pubmed/15618411>
- Lu Y, Sharkey TD.** 2004. The role of amylomaltase in maltose metabolism in the cytosol of photosynthetic cells. *Planta* **218**, 466-473 <http://www.ncbi.nlm.nih.gov/pubmed/14593480>
- Ritte G, Heydenreich M, Mahlow S, Haebel S, Kötting O, Steup M.** 2006. Phosphorylation of C6- and C3-positions of glucosyl residues in starch is catalysed by distinct dikinases. *FEBS Letters* **580**, 4872-4876. <http://www.ncbi.nlm.nih.gov/pubmed/16914145>

- Stettler M, Eicke S, Mettler T, Messerli G, Hortensteiner S, Zeeman SC.** 2009. Blocking the metabolism of starch breakdown products in Arabidopsis leaves triggers chloroplast degradation. *Molecular Plant* **2**, 1233-1246.  
<http://www.ncbi.nlm.nih.gov/pubmed/19946617>
- Streb S, Delatte T, Umhang M, Eicke S, Schorderet M, Reinhardt D, Zeeman SC.** 2008. Starch granule biosynthesis in Arabidopsis is abolished by removal of all debranching enzymes but restored by the subsequent removal of an endoamylase. *The Plant Cell*. **20**, 3448-3466.  
<http://www.ncbi.nlm.nih.gov/pubmed/19074683>
- Tanz SK, Castleden I, Hooper CM, Vacher M, Small I; Millar, AH.** 2013. SUBA3: a database for integrating experimentation and prediction to define the SUBcellular location of proteins in Arabidopsis. *Nucleic Acids Research*. **41(D)**, 1185-1191.  
<http://www.ncbi.nlm.nih.gov/pubmed/23180787>
- Wattebled F, Planchot V, Dong Y, Szydlowski N, Pontoire B, Devin A, Ball S, D'Hulst C.** 2008. Further evidence for the mandatory nature of polysaccharide debranching for the aggregation of semicrystalline starch and for overlapping functions of debranching enzymes in Arabidopsis leaves. *Plant Physiology* **148**, 1309-1323.  
<http://www.ncbi.nlm.nih.gov/pubmed/18815382>
- Yu T-S, Kofler H, Häusler RE, Hille D, Flügge UI, Zeeman SC, Smith AM, Kossmann J, Lloyd J, Ritte G, Steup M, Lue W-L, Weber A.** 2001. The Arabidopsis *sex1* mutant is defective in the R1 protein, a general regulator of starch degradation in plants, and not the chloroplast hexose transporter. *The Plant Cell* **13**, 1907-1918.  
<http://www.ncbi.nlm.nih.gov/pubmed/11487701>
